# Supplementary material for: Probe and dye design through copper-mediated reactions of N-arylhydroxylamines
Source: Royal Society of Chemistry journal article supplement (doi:10.1039/d2ob01595a), 2022-01-01
Supplement: d2ob01595a1.pdf [file d2ob01595a1.pdf]

## Supporting Information

### Probes and Dyes Design through Copper-mediated Reactions of *N*-arylhydroxylamines

Xiaotong Xia<sup>a,c</sup>, Shuru Liu<sup>a,c</sup>, Wenming Liu<sup>b,c</sup>, Qiuying Xu<sup>a</sup>, Ximing Xu<sup>d</sup>, Fang Liu<sup>b,\*</sup>,  
Tao Deng<sup>a,c,\*</sup>

<sup>a</sup>Lingnan Medical Research Center, The first Affiliated Hospital of Guangzhou University of Chinese Medicine, Guangzhou, 510006, PR China

<sup>b</sup>School of Pharmaceutical Sciences, Guangzhou University of Chinese Medicine, Guangzhou, 510006, PR China

<sup>c</sup>Artemisinin Research Center, Guangzhou University of Chinese Medicine, Guangzhou, 510006, PR China

<sup>d</sup>School of Medicine and Pharmacy, Ocean University of China, Qingdao 266071, Shandong, China

### Contents

|                                         |    |
|-----------------------------------------|----|
| 1. Reagents and apparatus .....         | 1  |
| 2. Synthesis and characterization ..... | 2  |
| 3. Characterization of compounds.....   | 5  |
| 4. Supplementary data .....             | 10 |
| 5. HPLC and NMR spectra .....           | 17 |
| 6. References .....                     | 38 |

## 1. Reagents and apparatus

Chemicals were purchased from commercial sources, all reagents were AR grade and used without further purification. The distilled deionized water from a Milli-Q Plus system was used throughout the experiments. A high-performance liquid chromatography (Agilent HPLC 1260, USA) system and a reverse phase C18 column (250 x 4.6 mm) were applied when needed. Photo-reductive reaction was carried out by a photochemical reactor (WATTCAS, Xi'an). Fluorescence reading was performed by a Varioskan LUX plate reader (Thermo Fisher) supplied with the software SkanIt 4.1. High resolution mass (HRMS) was collected from a Triple TOF5600 system (SCIEX). ICP-MS was collected on an Agilent 7700ICP-MS. Fluorescence lifetime was measured by a Fluoro Max-4 (HORIBA Scientific).  $^1\text{H}$  and  $^{13}\text{C}$  NMR spectra were recorded on AVANCE III HD 400 MHz and ASCEND™ 400 MHz digital NMR spectrometer (Switzerland). Data was reported as follows: chemical shift, multiplicity (s = singlet, d = doublet, and m = multiplet), coupling constant ( $J$  values) in Hz and integration.

## 2. Synthesis and characterization

### 2.1 General procedure for compound 3

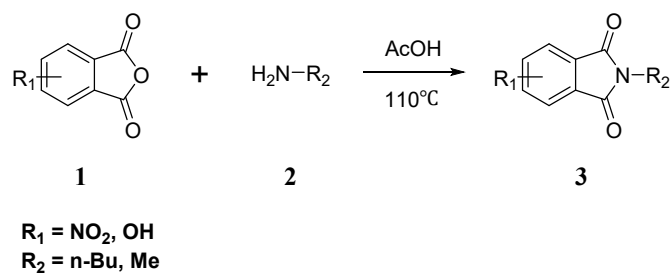

Compound **1** (2 mmol) was dissolved in 5 mL acetic acid, amine **2** (3mmol) was then added drop wise into the solution under stirring. The reaction was performed at 110°C for 2 h. When the reaction mixture was cooled to room temperature, cool water was added. The precipitates were collected and washed with cool water, and then dried against a vacuum to give the products.

### 2.2 General procedure for compound 4[1]

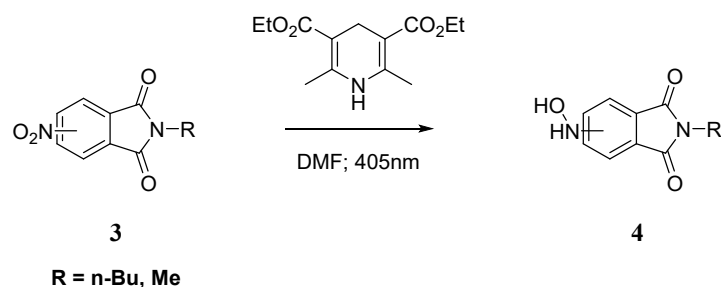

Compound **3** (1 mmol) and diethyl 2,6-dimethyl-1,4-dihydropyridine-3,5-dicarboxylate (Hantzsch ester, 1.0-4.0 mmol) were dissolved in 4 mL DMF in a round bottom reaction tube. The tube was then placed into the photochemical reactor and irradiated with a 5W blue LED ( $\lambda_{\text{max}} = 405 \text{ nm}$ ). The reaction was monitored by TLC until **3** is completely consumed. Distilled water was added, the solution was then extracted with ethyl acetate twice, the organic layer was then washed with saturated NaCl solution and dried over anhydrous  $\text{Na}_2\text{SO}_4$ . The organic layer was concentrated by a rotary evaporator and then purified by silica gel column chromatography using the mixture of methanol/dichloromethane as the eluent.

### 2.3 General procedure for compound 5

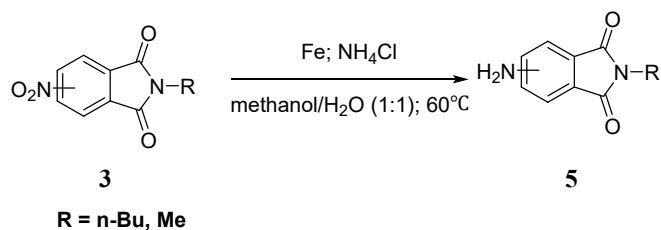

Ferrous powder (5eq) was added into the mixture of **3** (1eq, 1 mmol) and ammonium chloride (10 eq, 10 mmol) in methanol/ $\text{H}_2\text{O}$  (1:1). The reaction was performed at  $60^\circ\text{C}$  for 2 hours, and then cooled to room temperature. The mixture was filtered, the filtrate was collected. After removal of methanol under reduced pressure, the resulting aqueous fraction was adjusted to pH 4 with 2M HCl and then extracted with ethyl acetate. The organic layer was washed with saturated NaCl and dried over anhydrous  $\text{Na}_2\text{SO}_4$ . After concentrated under reduced pressure, the crude residue was purified by silica gel flash column chromatography using the mixture of methanol/dichloromethane as the eluent.

### 2.4 General procedure for compound 7

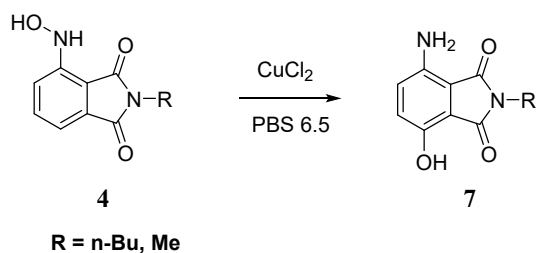

Compound **4** (0.2 mmol) and  $\text{CuCl}_2$  (0.02 mmol) was dissolved in 20 mL PBS buffer (pH 6.5). The mixture was stirred at  $50^\circ\text{C}$  for 6 hours. The reaction mixture was then extracted three times

with ethyl acetate. After washing with brine, the organic fraction was dry against  $\text{Na}_2\text{SO}_4$ . The crude residue was purified by silica gel flash column chromatography using the mixture of methanol/dichloromethane as the eluent.

## 2.5 General procedure for compound 8

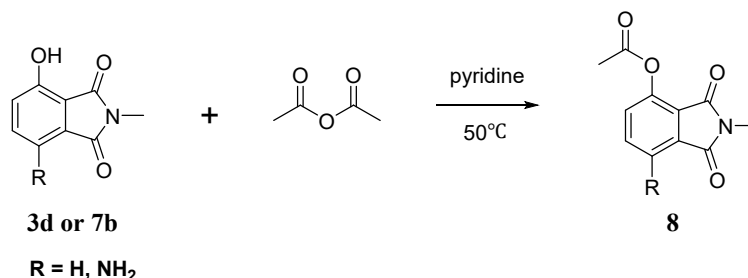

Compound **3d** or **7b** (1eq, 0.3 mmol) was dissolved in 4 mL pyridine at 0 °C. Acetic anhydride (1.2eq, 0.36 mmol) was added drop wise to the solution. After stirring at 0°C for 5min, the reaction mixture was heated to 50°C. One hour later, ice water was added, the mixture was then extracted twice with ethyl acetate. The organic layer was dried with anhydrous  $\text{Na}_2\text{SO}_4$ . The purified product was obtained by silica gel flash column chromatography dichloromethane/methanol = 100/1).

## 2.6 Synthesis of 4-amino-7-methoxy-2-methylisindoline-1,3-dione (9)

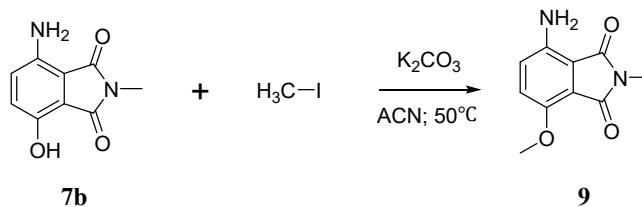

Compound **7b** (21mg, 0.11 mmol) was dissolved in 5 mL-acetonitrile, iodomethane (78 mg, 0.55 mmol) was then added while stirring, followed by finely powdered  $\text{K}_2\text{CO}_3$  (30 mg, 0.22 mmol). After stirring at 50°C for 10 hours, the mixture was cooled and the solvent was removed. The crude product was purified by silica gel column chromatography dichloromethane/methanol= 100/1) to give **9** 5.2 mg (23%yield).

## 2.7 Synthesis of N-(7-hydroxy-2-methyl-1,3-dioxoisindolin-4-yl)acetamide (10)

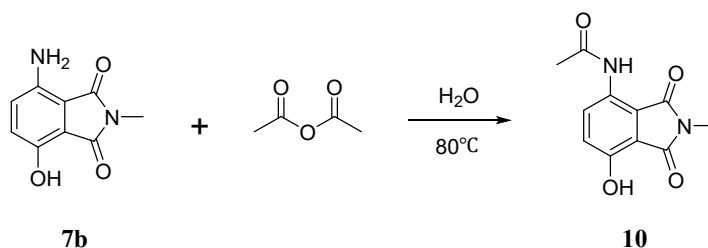

Compound **7b** (0.16 mmol) was dissolved in 5 mL distilled deionized water. Acetic anhydride

(500  $\mu$ L) was added drop wise to the solution. The reaction was stirred at 80°C for 20 hours and then cooled to room temperature. Distilled water was added and the mixture was extracted with ethyl acetate. The organic layer was separated and dried over anhydrous  $\text{Na}_2\text{SO}_4$ . After concentrating under vacuum, the crude product was purified by silica gel column chromatography (dichloromethane/methanol = 100/1) to give **10** 14.3 mg (39% yield).

## 2.8 Synthesis of N-(2-methyl-1,3-dioxoisindolin-4-yl)acetamide (**11**)

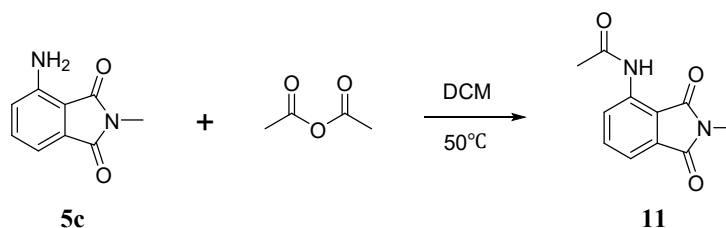

Compound **5b** (30 mg, 0.17 mmol) was added into 5 mL dried dichloromethane followed by the addition of acetic anhydride (300  $\mu$ L). The mixture was then heated to 50°C by a heating mantle and stirred at this temperature for 15 h. When the reaction mixture was cooled to room temperature, the solvent was removed and the crude product was purified by silica gel column chromatography (dichloromethane/methanol = 200/1) to give **11** (30.1 mg, 82% yield).

## 3. Characterization of compounds

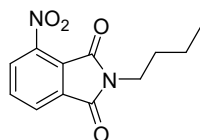

**2-butyl-4-nitroisindoline-1,3-dione (3a)**: white solid, 80% yield; <sup>1</sup>H NMR (400 MHz, CDCl<sub>3</sub>)  $\delta$  8.13 – 8.06 (m, 2H), 7.93 – 7.87 (m, 1H), 3.73 – 3.70 (m, 2H), 1.71 – 1.62 (m, 2H), 1.39– 1.32 (m, 2H), 0.96 – 0.93 (m, 3H). <sup>13</sup>C NMR (100 MHz, CDCl<sub>3</sub>)  $\delta$  165.97, 163.06, 145.09, 135.39, 134.22, 128.49, 126.99, 123.84, 38.56, 30.40, 20.08, 13.61. HRMS (ESI) m/z: [M+H]<sup>+</sup> Calcd for C<sub>12</sub>H<sub>12</sub>N<sub>2</sub>O<sub>4</sub>H<sup>+</sup> 249.0870; Found 249.0867.

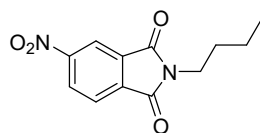

**2-butyl-5-nitroisindoline-1,3-dione (3b)**: white solid, 81% yield; <sup>1</sup>H NMR (400 MHz, CDCl<sub>3</sub>)  $\delta$  8.65 (d, J = 1.8 Hz, 1H), 8.61– 8.58 (m, 1H), 8.03 (d, J = 8.1 Hz, 1H), 3.76 – 3.72 (m, 2H), 1.73 – 1.63 (m, 2H), 1.42 – 1.32 (m, 2H), 0.97 – 0.93 (m, 3H). <sup>13</sup>C NMR (100 MHz, CDCl<sub>3</sub>)  $\delta$  166.40, 166.11, 151.84, 136.71, 133.68, 129.29, 124.48, 118.71, 38.64, 30.56, 20.16, 13.69. HRMS (ESI) m/z: [M+H]<sup>+</sup> Calcd for C<sub>12</sub>H<sub>12</sub>N<sub>2</sub>O<sub>4</sub>H<sup>+</sup> 249.0870; Found 249.0869.

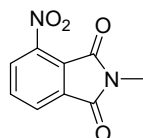

**2-methyl-4-nitroisoindoline-1,3-dione (3c):** white solid, 57% yield;  $^1\text{H}$  NMR (400 MHz,  $\text{CDCl}_3$ )  $\delta$  8.09– 8.06 (m, 2H), 7.93– 7.89 (m, 1H), 3.16 (s, 3H).  $^{13}\text{C}$  NMR (100 MHz,  $\text{CDCl}_3$ )  $\delta$  165.83, 163.02, 144.82, 135.46, 134.07, 128.39, 126.92, 123.72, 24.44. HRMS (ESI)  $m/z$ :  $[\text{M}+\text{H}]^+$  Calcd for  $\text{C}_9\text{H}_6\text{N}_2\text{O}_4\text{H}^+$  207.0400; Found 207.0400.

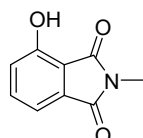

**4-hydroxy-2-methylisoindoline-1,3-dione (3d, PHI-1):** white solid, 63% yield;  $^1\text{H}$  NMR (400 MHz,  $d_6$ -DMSO)  $\delta$  10.95 (s, 1H), 7.59– 7.55 (m, 1H), 7.25– 7.23 (m, 1H), 7.19– 7.16 (m, 1H), 2.95 (s, 3H).  $^{13}\text{C}$  NMR (100 MHz,  $d_6$ -DMSO)  $\delta$  167.83, 166.79, 154.97, 135.73, 133.77, 123.07, 114.86, 113.82, 23.42. HRMS (ESI)  $m/z$ :  $[\text{M}+\text{H}]^+$  Calcd for  $\text{C}_9\text{H}_7\text{NO}_3\text{H}^+$  178.0499; Found 178.0488.

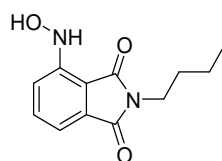

**2-butyl-4-(hydroxyamino)isoindoline-1,3-dione (4a, P1):** yellow solid, 40% yield;  $^1\text{H}$  NMR (400 MHz,  $(\text{CD}_3)_2\text{CO}$ )  $\delta$  8.56 (s, 1H), 8.41 (s, 1H), 7.67 – 7.64 (m, 1H), 7.50 (d,  $J = 8.4$  Hz, 1H), 7.21 (d,  $J = 7.1$  Hz, 1H), 3.60 – 3.57 (m, 2H), 1.65– 1.58 (m, 2H), 1.39 – 1.29 (m, 2H), 0.95 – 0.91 (m, 3H).  $^{13}\text{C}$  NMR (100 MHz,  $(\text{CD}_3)_2\text{CO}$ )  $\delta$  168.98, 168.03, 149.02, 135.30, 132.52, 118.56, 113.43, 111.90, 36.93, 30.46, 19.76, 13.02. HRMS (ESI)  $m/z$ :  $[\text{M}+\text{H}]^+$  Calcd for  $\text{C}_{12}\text{H}_{14}\text{N}_2\text{O}_3\text{H}^+$  235.1077; Found 235.1079.

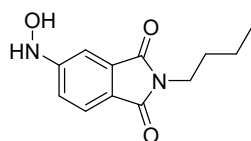

**2-butyl-5-(hydroxyamino)isoindoline-1,3-dione (4b, P2):** light orange solid, 95% yield;  $^1\text{H}$  NMR (400 MHz,  $\text{CDCl}_3$ )  $\delta$  7.69 (d,  $J = 8.1$  Hz, 1H), 7.44 (d,  $J = 1.6$  Hz, 1H), 7.20 – 7.13 (m, 2H), 5.98 (s, 1H), 3.66 – 3.62 (m, 2H), 1.67 – 1.58 (m, 2H), 1.39– 1.30 (m, 2H), 0.95 – 0.91 (m, 3H).  $^{13}\text{C}$  NMR (100 MHz,  $\text{CDCl}_3$ )  $\delta$  168.85, 168.60, 155.70, 134.30, 124.52, 124.49, 117.42, 108.17, 37.91, 30.82, 20.22, 13.79. HRMS (ESI)  $m/z$ :  $[\text{M}+\text{H}]^+$  Calcd for  $\text{C}_{12}\text{H}_{14}\text{N}_2\text{O}_3\text{H}^+$  235.1077; Found 235.1077.

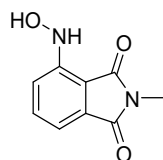

**4-(hydroxyamino)-2-methylisoindoline-1,3-dione (4c):** yellow solid, 55% yield;  $^1\text{H}$  NMR (400 MHz, *d6*-DMSO)  $\delta$  9.06 (d,  $J = 1.4$  Hz, 1H), 8.89 (s, 1H), 7.64–7.60 (m, 1H), 7.37 (d,  $J = 8.4$  Hz, 1H), 7.15 (d,  $J = 7.1$  Hz, 1H), 2.97 (s, 3H).  $^{13}\text{C}$  NMR (100 MHz, *d6*-DMSO)  $\delta$  168.40, 168.19, 148.61, 135.50, 132.33, 118.07, 112.73, 110.63, 23.38. HRMS (ESI)  $m/z$ :  $[\text{M}+\text{Na}]^+$  Calcd for  $\text{C}_9\text{H}_8\text{N}_2\text{O}_3\text{Na}^+$  215.0427; Found 215.0428.

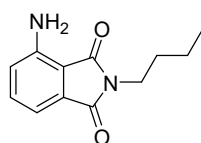

**4-amino-2-butylisoindoline-1,3-dione (5a):** yellow oil, 80% yield;  $^1\text{H}$  NMR (400 MHz, *d6*-DMSO)  $\delta$  7.42–7.38 (m, 1H), 6.98–6.91 (m, 2H), 6.42 (s, 2H), 3.50–3.46 (m, 2H), 1.55–1.48 (m, 2H), 1.28–1.21 (m, 2H), 0.89–0.85 (m, 3H).  $^{13}\text{C}$  NMR (100 MHz, *d6*-DMSO)  $\delta$  169.60, 168.19, 146.47, 135.13, 132.42, 121.43, 110.71, 109.02, 36.58, 30.20, 19.57, 13.57. HRMS (ESI)  $m/z$ :  $[\text{M}+\text{H}]^+$  Calcd for  $\text{C}_{12}\text{H}_{14}\text{N}_2\text{O}_2\text{H}^+$  219.1128; Found 219.1123.

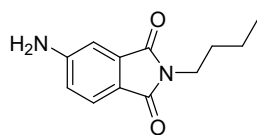

**5-amino-2-butylisoindoline-1,3-dione (5b):** light yellow solid, 68.2% yield;  $^1\text{H}$  NMR (400 MHz, *d6*-DMSO)  $\delta$  7.46 (d,  $J = 8.2$  Hz, 1H), 6.90 (d,  $J = 2.0$  Hz, 1H), 6.79–6.76 (m, 1H), 6.44 (s, 2H), 3.48–3.45 (m, 2H), 1.56–1.45 (m, 2H), 1.29–1.19 (m, 2H), 0.89–0.85 (m, 3H).  $^{13}\text{C}$  NMR (100 MHz, *d6*-DMSO)  $\delta$  168.34, 168.04, 154.92, 134.45, 124.79, 116.60, 116.50, 106.94, 36.64, 30.20, 19.50, 13.50. HRMS (ESI)  $m/z$ :  $[\text{M}+\text{H}]^+$  Calcd for  $\text{C}_{12}\text{H}_{14}\text{N}_2\text{O}_2\text{H}^+$  219.1128; Found 219.1122

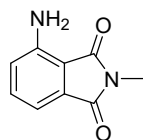

**4-amino-2-methylisoindoline-1,3-dione (5c, PHI-2):** light yellow solid, 83% yield;  $^1\text{H}$  NMR (400 MHz, *d6*-DMSO)  $\delta$  7.42–7.38 (m, 1H), 6.98–6.91 (m, 2H), 6.41 (s, 2H), 2.95 (s, 3H).  $^{13}\text{C}$  NMR (100 MHz, *d6*-DMSO)  $\delta$  169.59, 168.24, 146.31, 134.99, 132.58, 121.30, 110.61, 109.23, 23.23. HRMS (ESI)  $m/z$ :  $[\text{M}+\text{K}]^+$  Calcd for  $\text{C}_9\text{H}_8\text{N}_2\text{O}_2\text{K}^+$  215.0217; Found 215.0223.

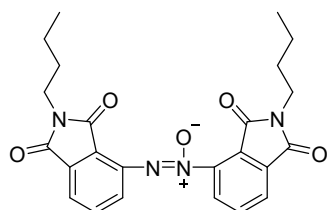

**1,2-bis(2-butyl-1,3-dioxisoindolin-4-yl)diazene 1-oxide (6a):** light orange solid, 19.7% yield;  $^1\text{H}$  NMR (400 MHz,  $\text{CDCl}_3$ )  $\delta$  8.26 – 8.24 (m, 1H), 8.12 – 7.81(m, 5H), 3.77 – 3.65 (m, 4H), 1.71 – 1.61 (m, 4H), 1.47 – 1.30 (m, 4H), 0.97 – 0.91 (m, 6H).  $^{13}\text{C}$  NMR (100 MHz,  $\text{CDCl}_3$ )  $\delta$  168.03, 166.79, 166.63, 164.35, 148.33, 144.04, 140.06, 135.48, 135.13, 133.71, 133.26, 129.03, 127.97, 126.00, 125.41, 123.80, 123.45, 122.72, 121.86, 38.50, 38.09, 30.73, 30.59, 20.24, 20.22, 13.77, 13.73. HRMS (ESI)  $m/z$ :  $[\text{M}+\text{H}]^+$  Calcd for  $\text{C}_{24}\text{H}_{24}\text{N}_4\text{O}_5\text{H}^+$  449.1820; Found 449.1813.

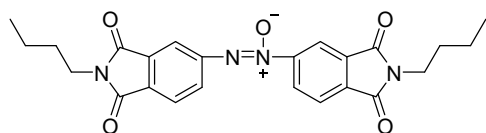

**1,2-bis(2-butyl-1,3-dioxisoindolin-5-yl)diazene 1-oxide (6b):** light yellow solid, 31.4% yield;  $^1\text{H}$  NMR (400 MHz,  $\text{CDCl}_3$ )  $\delta$  8.80 (d,  $J$  = 1.9 Hz, 1H), 8.76 – 8.69 (m, 2H), 8.36 – 8.34 (m, 1H), 8.03 (d,  $J$  = 8.2 Hz, 1H), 7.97 (d,  $J$  = 8.1 Hz, 1H), 3.77 – 3.71 (m, 4H), 1.73 – 1.66 (m, 4H), 1.43 – 1.35 (m, 4H), 0.99 – 0.95 (m, 6H).  $^{13}\text{C}$  NMR (100 MHz,  $\text{CDCl}_3$ )  $\delta$  167.54, 167.44, 166.83, 166.67, 151.86, 147.70, 134.88, 133.31, 133.09, 132.48, 131.52, 128.17, 124.06, 123.88, 119.68, 117.83, 38.40, 38.14, 30.61, 30.53, 20.10, 20.09, 13.65, 13.62. HRMS (ESI)  $m/z$ :  $[\text{M}+\text{H}]^+$  Calcd for  $\text{C}_{24}\text{H}_{24}\text{N}_4\text{O}_5\text{H}^+$  449.1820; Found 449.1818.

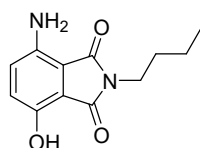

**4-amino-2-butyl-7-hydroxyisoindoline-1,3-dione (7a):** yellow oil, 21% yield;  $^1\text{H}$  NMR (400 MHz,  $d_6$ -DMSO)  $\delta$  9.89 (s, 1H), 6.96 (d,  $J$  = 9.0 Hz, 1H), 6.89 (d,  $J$  = 9.0 Hz, 1H), 5.96 (s, 2H), 3.46 – 3.43 (m, 2H), 1.54 – 1.47 (m, 2H), 1.29 – 1.19 (m, 2H), 0.89 – 0.85 (m, 3H).  $^{13}\text{C}$  NMR (100 MHz,  $d_6$ -DMSO)  $\delta$  168.99, 166.59, 146.12, 140.21, 126.36, 124.77, 112.51, 108.18, 36.18, 30.19, 19.50, 13.52. HRMS (ESI)  $m/z$ :  $[\text{M}+\text{H}]^+$  Calcd for  $\text{C}_{12}\text{H}_{14}\text{N}_2\text{O}_3\text{H}^+$  235.1077; Found 235.1071.

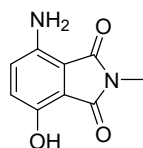

**4-amino-7-hydroxy-2-methylisoindoline-1,3-dione (7b, PHI-3):** orange solid, 22% yield;  $^1\text{H}$  NMR (400 MHz,  $d_6$ -DMSO)  $\delta$  9.88 (s, 1H), 6.96 (d,  $J$  = 9.0 Hz, 1H), 6.88 (d,  $J$  = 9.0 Hz, 1H), 5.95 (s, 2H), 2.91 (s, 3H).  $^{13}\text{C}$  NMR (100 MHz,  $d_6$ -DMSO)  $\delta$  169.04, 166.68, 146.02, 140.13, 126.26, 124.70, 112.72, 108.43, 22.99. HRMS (ESI)  $m/z$ :  $[\text{M}+\text{H}]^+$  Calcd for  $\text{C}_9\text{H}_8\text{N}_2\text{O}_3\text{H}^+$  193.0601; Found 193.0601.



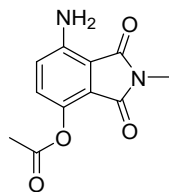

**7-amino-2-methyl-1,3-dioxoisindolin-4-yl acetate (8a, PHI-4):** yellow solid, 43% yield;  $^1\text{H}$  NMR (400 MHz, *d6*-DMSO)  $\delta$  7.15 (d, *J* = 9.0 Hz, 1H), 6.99 (d, *J* = 8.9 Hz, 1H), 6.43 (s, 2H), 2.92 (s, 3H), 2.27 (s, 3H).  $^{13}\text{C}$  NMR (100 MHz, *d6*-DMSO)  $\delta$  168.91, 168.75, 165.73, 144.52, 135.69, 130.18, 123.11, 121.92, 108.76, 23.24, 20.41. HRMS (ESI) *m/z*:  $[\text{M}+\text{H}]^+$  Calcd for  $\text{C}_{11}\text{H}_{10}\text{N}_2\text{O}_4\text{H}^+$  235.0713; Found 235.0707.

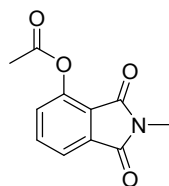

**2-methyl-1,3-dioxoisindolin-4-yl acetate (8b, PHI-6):** white solid, 80% yield;  $^1\text{H}$  NMR (400 MHz,  $\text{CDCl}_3$ )  $\delta$  7.75 – 7.68 (m, 2H), 7.35– 7.32 (m, 1H), 3.13 (s, 3H), 2.42 (s, 3H).  $^{13}\text{C}$  NMR (100 MHz,  $\text{CDCl}_3$ )  $\delta$  168.68, 167.56, 166.11, 146.49, 135.63, 133.83, 128.25, 123.07, 120.88, 23.94, 20.68. HRMS (ESI) *m/z*:  $[\text{M}+\text{H}]^+$  Calcd for  $\text{C}_{11}\text{H}_9\text{NO}_4\text{H}^+$  220.0604; Found 220.0599.

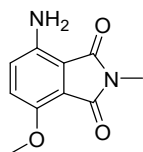

**4-amino-7-methoxy-2-methylisindoline-1,3-dione (9, PHI-5):** yellow solid, 23% yield;  $^1\text{H}$  NMR (400 MHz, *d6*-DMSO)  $\delta$  6.81 (d, *J* = 9.1 Hz, 1H), 6.58 (d, *J* = 9.1 Hz, 1H), 5.63 (s, 2H), 3.40 (s, 3H), 2.50 (s, 3H).  $^{13}\text{C}$  NMR (100 MHz, *d6*-DMSO)  $\delta$  169.01, 166.11, 147.47, 140.90, 124.30, 122.36, 115.49, 109.41, 56.51, 23.10. HRMS (ESI) *m/z*:  $[\text{M}+\text{H}]^+$  Calcd for  $\text{C}_{10}\text{H}_{10}\text{N}_2\text{O}_3\text{H}^+$  207.0764; Found 207.0768.

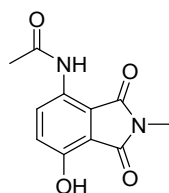

**N-(7-hydroxy-2-methyl-1,3-dioxoisindolin-4-yl)acetamide (10, PHI-7):** light yellow solid, 48% yield;  $^1\text{H}$  NMR (400 MHz, *d6*-DMSO)  $\delta$  10.81 (s, 1H), 9.53 (s, 1H), 8.17 (d, *J* = 9.1 Hz, 1H), 7.14 (d, *J* = 9.1 Hz, 1H), 2.94 (s, 3H), 2.11 (s, 3H).  $^{13}\text{C}$  NMR (100 MHz, *d6*-DMSO)  $\delta$  168.64, 168.20, 166.16, 151.05, 128.79, 128.61, 124.53, 118.63, 113.63, 24.03, 23.34. HRMS (ESI) *m/z*:  $[\text{M}+\text{H}]^+$  Calcd for  $\text{C}_{11}\text{H}_{10}\text{N}_2\text{O}_4\text{H}^+$  235.0713; Found 235.0711.

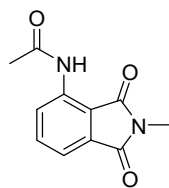

**N-(2-methyl-1,3-dioxoisindolin-4-yl)acetamide (11, PHI-8):** white solid, 81% yield;  $^1\text{H}$  NMR (400 MHz, *d6*-DMSO)  $\delta$  9.60 (s, 1H), 8.38 (d,  $J = 8.3$  Hz, 1H), 7.72– 7.68 (m, 1H), 7.48 (d,  $J = 7.2$  Hz, 1H), 2.99 (s, 3H), 2.18 (s, 3H).  $^{13}\text{C}$  NMR (100 MHz, *d6*-DMSO)  $\delta$  169.62, 169.08, 167.94, 136.59, 135.89, 132.35, 125.69, 118.14, 117.54, 24.70, 23.99. HRMS (ESI)  $m/z$ :  $[\text{M}+\text{H}]^+$  Calcd for  $\text{C}_{11}\text{H}_{10}\text{N}_2\text{O}_3\text{H}^+$  219.0764; Found 219.0755.

## 4. Supplementary data

### 4.1 Summary of recent studies on copper ions fluorescence detection.

Table S1. A list of recently published fluorescence detection systems for copper ions

| Probe                       | Substrate                    | Mechanism                                             | Linear range          | LOD                                              | Selectivity and anti-interference       | Ref. |
|-----------------------------|------------------------------|-------------------------------------------------------|-----------------------|--------------------------------------------------|-----------------------------------------|------|
| FLCS1                       | $\text{Cu}^+$                | Chelation; PET inhibition                             |                       |                                                  | Slightly influenced by $\text{Cu}^{2+}$ | [2]  |
| GdL <sub>1</sub>            | $\text{Cu}^{2+}$             | Chelation; affinity to HSA                            |                       |                                                  | Slightly influenced by $\text{Zn}^{2+}$ | [3]  |
| NDQI                        | $\text{Cu}^{2+}$             | Chelation; ICT inhibition                             | 0.31-50 $\mu\text{M}$ | 20 nM                                            | ROS influence                           | [4]  |
| CUSP                        | $\text{Cu}^+/\text{Cu}^{2+}$ | Chelation                                             | 0.50-10 $\mu\text{M}$ | $\text{Cu}^+$ : 42nM<br>$\text{Cu}^{2+}$ : 34nM; | Remarkable selectivity                  | [5]  |
| ZPSN                        | $\text{Cu}^+$                | Chelation; intramolecular ET inhibition               | 0-10 $\mu\text{M}$    | 8.2 nM                                           | $\text{Hg}^{2+}$ influence              | [6]  |
| DDP-Cu                      | $\text{Cu}^{2+}$             | $\text{Cu}^{2+}$ -catalyzed hydrolysis; ICT recovery  | 0-10 $\mu\text{M}$    | 36 nM                                            | Remarkable selectivity                  | [7]  |
| NIR-Cu                      | $\text{Cu}^{2+}$             | $\text{Cu}^{2+}$ -catalyzed hydrolysis                | 1-5 $\mu\text{M}$     | 29 nM                                            | Remarkable selectivity                  | [8]  |
| 1(naphthalimide-rhodamine)  | $\text{Cu}^{2+}$             | $\text{Cu}^{2+}$ -catalyzed hydrolysis; FRET recovery | 0-16 $\mu\text{M}$    | 18.6nM                                           | Low interference                        | [9]  |
| 1 (hydrazide-naphthalimide) | $\text{Cu}^{2+}$             | $\text{Cu}^{2+}$ -catalyzed hydrolysis; oxidative     | 0-25 $\mu\text{M}$    | 1.1 $\mu\text{M}$                                | Remarkable selectivity                  | [10] |
| OAHP                        | $\text{Cu}^{2+}$             | Decomposition and intramolecular                      | 0.05-2 $\mu\text{M}$  | 18 nM                                            | Remarkable selectivity                  | [11] |

|                                 |                                   |                                                      |              |                           |                        |           |
|---------------------------------|-----------------------------------|------------------------------------------------------|--------------|---------------------------|------------------------|-----------|
| 1(hemicyanine-pyridinecarbonyl) | Cu <sup>2+</sup>                  | cyclization                                          | 0.02-8μM     | 4.0 nM                    | Remarkable selectivity | [12]      |
|                                 |                                   | Cu <sup>2+</sup> -catalyzed hydrolysis; ICT recovery |              |                           |                        |           |
| P1                              | Cu <sup>2+</sup> /Cu <sup>+</sup> | Cleavage and rearrangement                           | 0.125-20 μM; | Cu <sup>2+</sup> : 1.11nM | Remarkable selectivity | This work |

#### 4.2 Copper ions detection by the newly synthetic probes.

The detection was performed mainly on Cu<sup>2+</sup> since free Cu<sup>+</sup> normally has stability issues in ambient atmospheric conditions. A typical detection was performed at 50 °C for 100 min in PBS buffer (pH 6.5). In the final detection solution, the concentration of P1 was set at 100 μM. The fluorescence intensity at the wavelength of 511 nm was collected upon 390 nm excitation. CuCl<sub>2</sub> and CuCl were used as the source of Cu<sup>2+</sup> and Cu<sup>+</sup> throughout the study unless otherwise noted. Data are presented as the mean ± SD (n = 3).

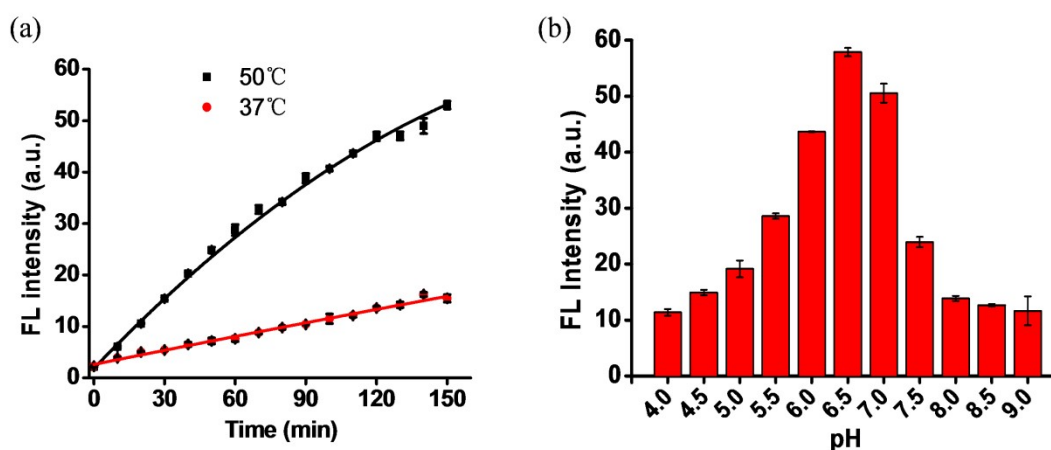

**Fig.S1.** (a) Kinetics study of P1-Cu<sup>2+</sup> reaction under 37 °C and 50°C, PBS (pH 6.5) was used as the solvent. (b) Cu<sup>2+</sup> detection under different pH conditions. The final concentration of P1 and Cu<sup>2+</sup> were set at 100 μM and 20 μM respectively.  $\lambda_{ex}$  =390 nm,  $\lambda_{em}$  = 511nm.

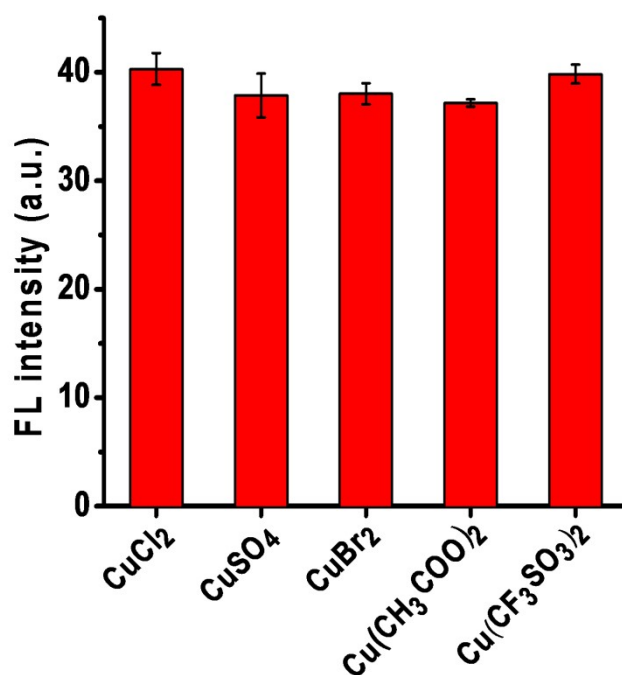

**Fig.S2.** Fluorescence detection of Cu<sup>2+</sup> over different anions. Detection was performed in PBS (pH 6.5), the final concentration of P1 and copper salt were set at 100 μM and 2μM, respectively.

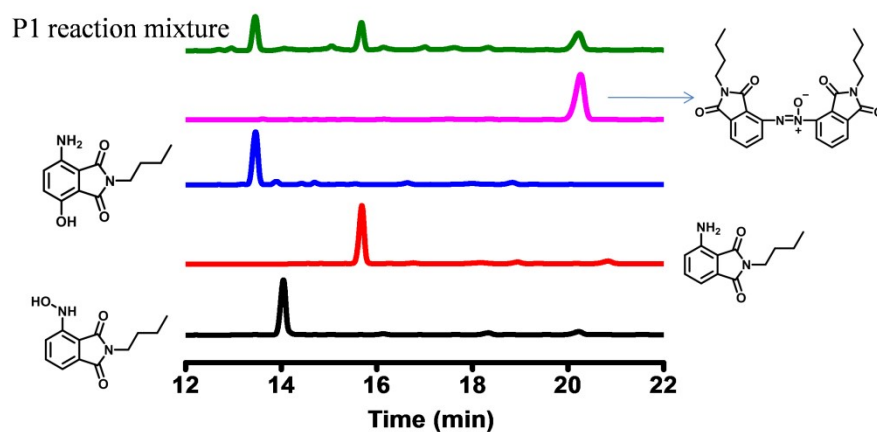

**Fig. S3.** HPLC analysis of the reaction solution of P1 (100 μM) and Cu<sup>2+</sup> (100 μM). The reaction was performed at 50 °C until P1 was completely consumed. The traces were monitored by the absorbance at 254 nm.

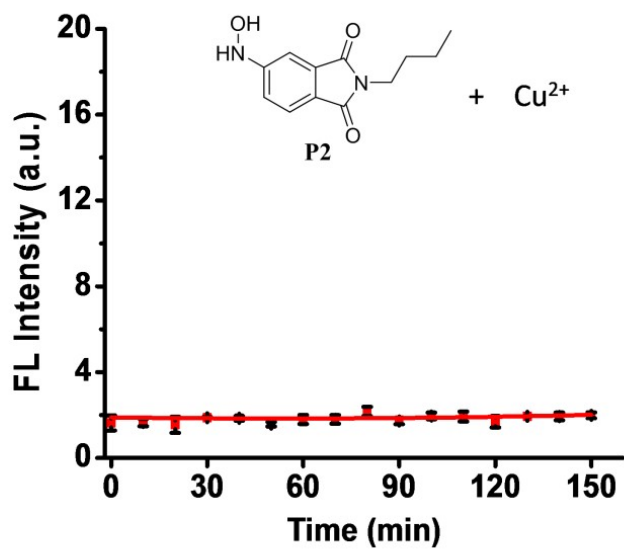

**Fig. S4.** Kinetic study of the fluorescence intensity from P2-Cu<sup>2+</sup> solution over the reaction time.  $\lambda_{\text{ex}} = 380 \text{ nm}$ ,  $\lambda_{\text{em}} = 525 \text{ nm}$ . The concentration of P2 and Cu<sup>2+</sup> were set at 100  $\mu\text{M}$  and 20  $\mu\text{M}$ , respectively.

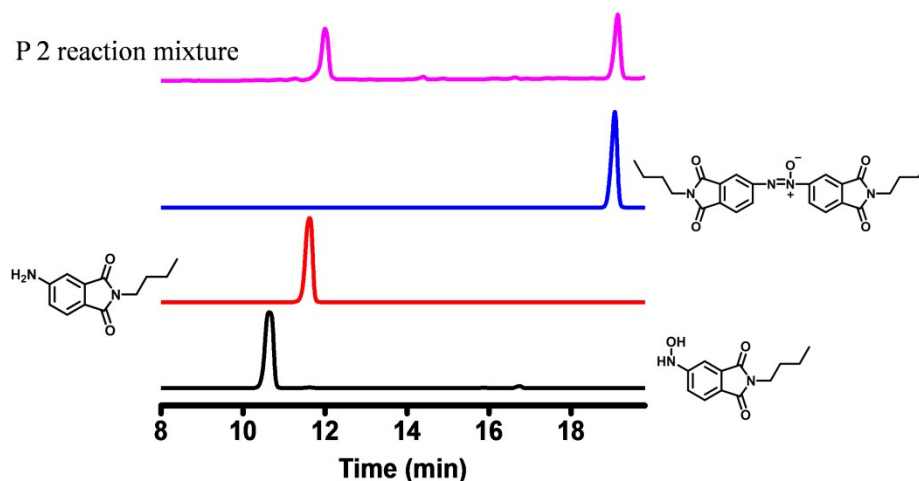

**Fig. S5.** HPLC analysis of the reaction solution of P2 (100  $\mu$ M) and  $\text{Cu}^{2+}$  (100  $\mu$ M). The reaction was performed at 50  $^{\circ}\text{C}$  until P2 was completely consumed. The traces were monitored by the absorbance at 254 nm.

HPLC analysis uses  $\text{H}_2\text{O}$  (mobile phase component A) mixed with ACN (mobile phase component B) as eluent following the sequence (A/B) 70:30 for 3 min, 70:30 to 20:80 during 8 min, 20:80 for 6 min, 20:80 to 70:30 during 3 min and then 70:30 for 3 min for P1; (A/B) 60:40 for 2 min, 60:40 to 10:90 during 10 min, 10:90 for 3 min, 10:90 to 60:40 during 3 min and 60:40 for 2 min for P2.

### 4.3. The attempts to understand the rearrangement mechanism

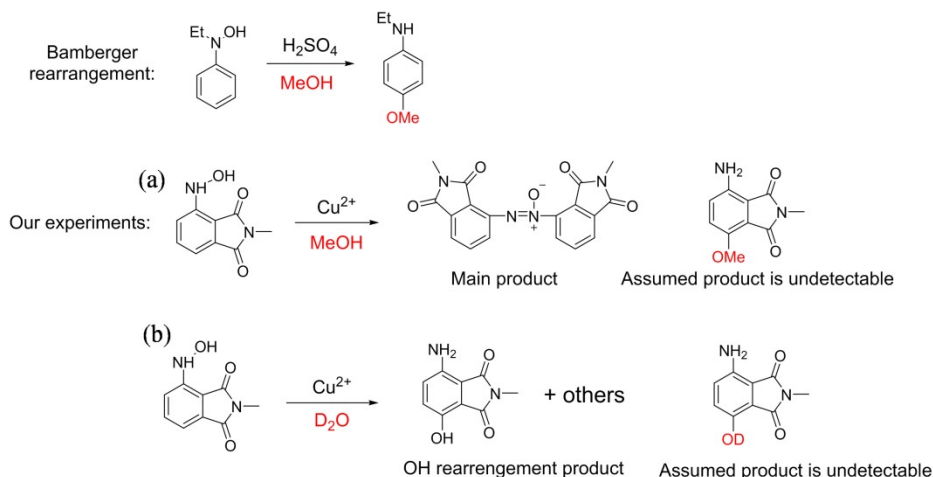

**Scheme S1.** Bamberger rearrangement reaction using methanol as the solvent and the reaction of 4c in the presence of  $\text{Cu}^{2+}$  using methanol and  $\text{D}_2\text{O}$  as the solvents, respectively.

We have put effort into the mechanism study and found some useful information, but it is still far from the fully understanding of the rearrangement mechanism. We noticed another reaction “Bamberger rearrangement” that can provide similar para-aminophenols from

hydroxylamines, which was usually performed in strong acidic mediums (e.g. sulfuric acid solution). Bamberger rearrangement is an intermolecular rearrangement, where the OH group is from H<sub>2</sub>O of the aqueous solvent. This intermolecular rearrangement can be proved by performing the reaction using MeOH as the solvent, in which *p*-amino anisole formed as the major products.[13]

Answering it is an intermolecular or intramolecular rearrangement is critical for us to understand the mechanism. With this purpose, Cu<sup>2+</sup> catalyzed reaction was performed in MeOH. However, no assumed rearranged products formed, and the azoxy product formed as the major product (Scheme S1a). In another experiment, the reaction was performed in D<sub>2</sub>O buffer (phosphate and NaCl were dissolved in D<sub>2</sub>O to prepared the PBS D<sub>2</sub>O solution). The reaction mixture was examined by high-resolution mass spectrometry, however, there is no any OD substituted product formed (Scheme S1B).

We failed to obtain the direct evidence to support either intermolecular or intramolecular rearrangement mechanisms. Therefore, it is too hard for us to propose a reliable reaction mechanism at current stage. Doubtlessly, great efforts have to be put in.

#### 4.4 Fluorescence lifetime measurement

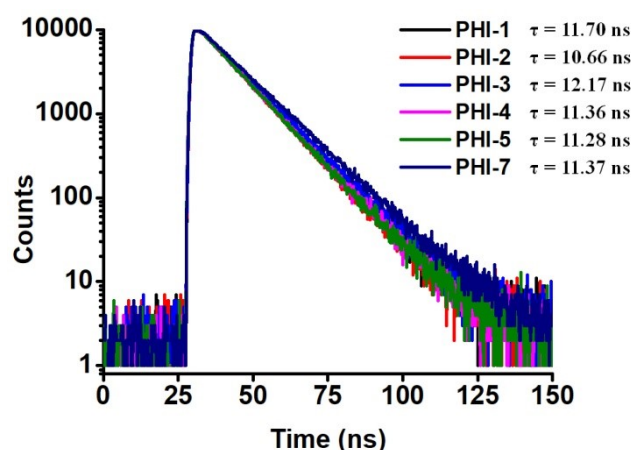

**Fig. S6.** Fluorescence lifetimes ( $\tau$ ) of the newly synthesized PHI-3, PHI-4, PHI-5 and PHI-7 versus PHI-1 and PHI-2.

The data was measured using PBS 7.4 solution containing each dye at 20  $\mu$ M. The average fluorescence lifetime was calculated from the double fit exponential function.[14]

#### 4.5 The spectrum characterization

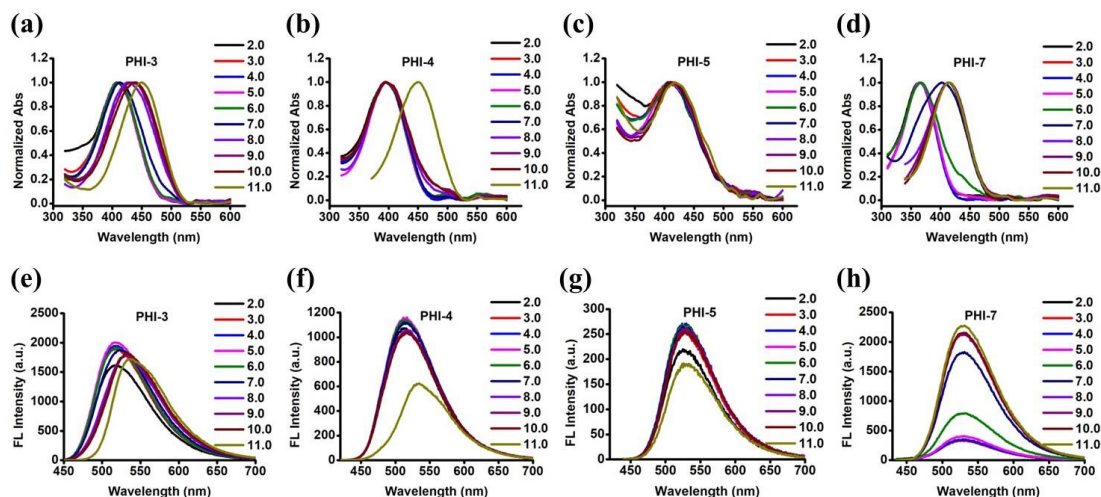

**Fig. S7.** The spectrum characterization of PHI-3, PHI-4, PHI-5 and PHI-7 in PBS buffer with different pH values (pH 2.0- pH 11.0). (a-d) the UV-vis absorbance spectra, (e-h) the fluorescence spectra. The value of maximum absorbance was normalized to 1 for easy comparison.

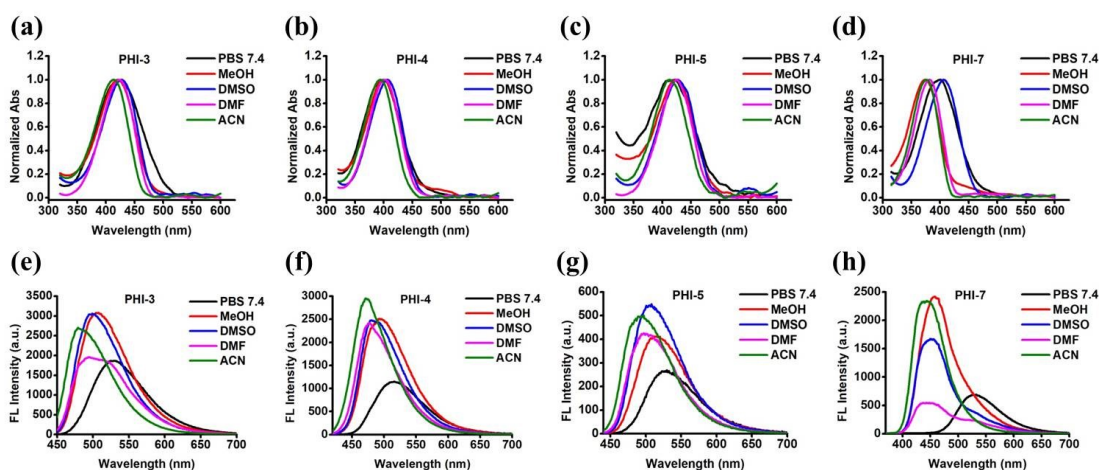

**Fig. S8.** The spectrum characterization of PHI-3, PHI-4, PHI-5 and PHI-7 in different solvent systems (PBS 7.4, methanol, dimethyl sulfoxide, dimethylformamide and acetonitrile). (a-d) the absorbance spectra, (e-h) the fluorescence spectra. The value of maximum absorbance was normalized to 1 for easy comparison.

The final concentrations of PHI-3, PHI-4 and PHI-7 were set at 20  $\mu\text{M}$  except PHI-5 (60  $\mu\text{M}$ ).

#### 4.6 Green fluorescent molecules



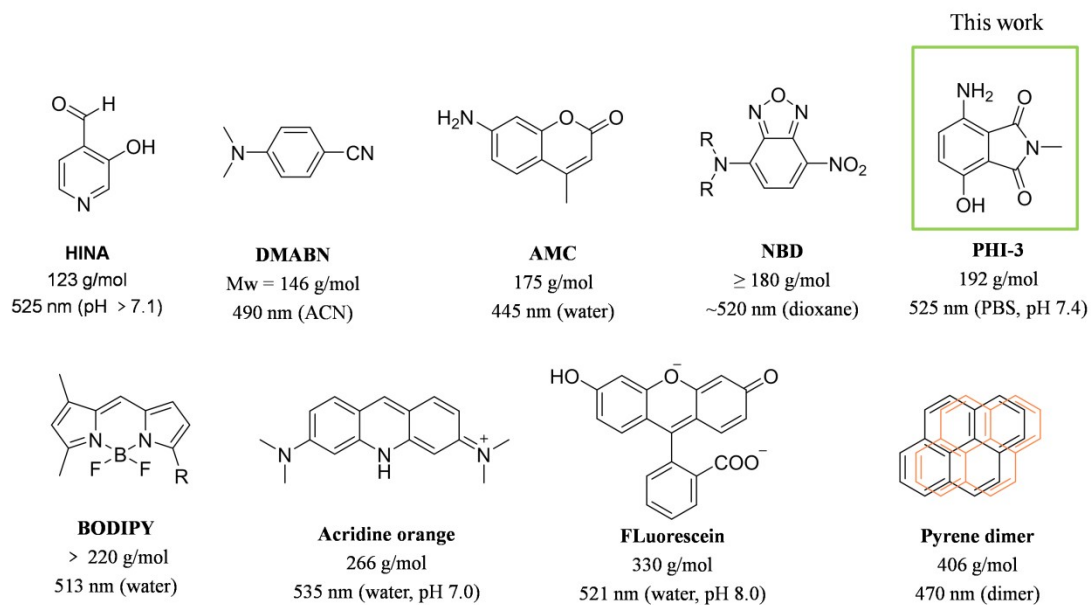

**Fig. S9.** The structures of dyes with typical green fluorescence or blue-green fluorescence. The contents were modified and renewed from the literature *Chem. Sci.*, 2021, 12, 1392.

## 5. HPLC and NMR spectra

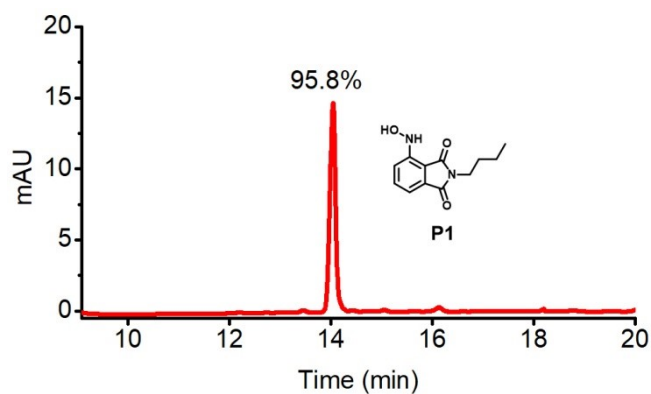

**Fig. S10.** HPLC analysis of P1, the purity reaches to 95.8% according to the HPLC-DAD chromatograms at 254 nm.

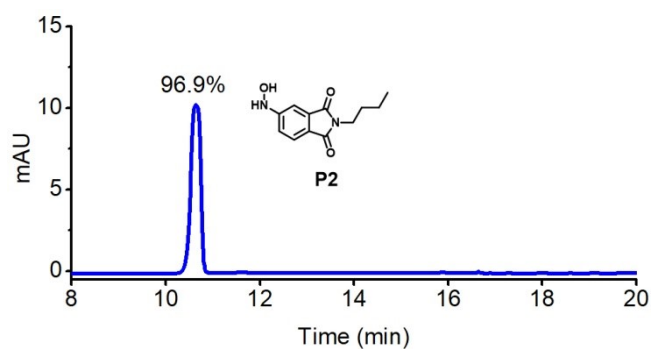

**Fig. S11.** HPLC analysis of P2, the purity of P2 reaches to 96.9% according to the HPLC-DAD chromatograms at 254 nm.

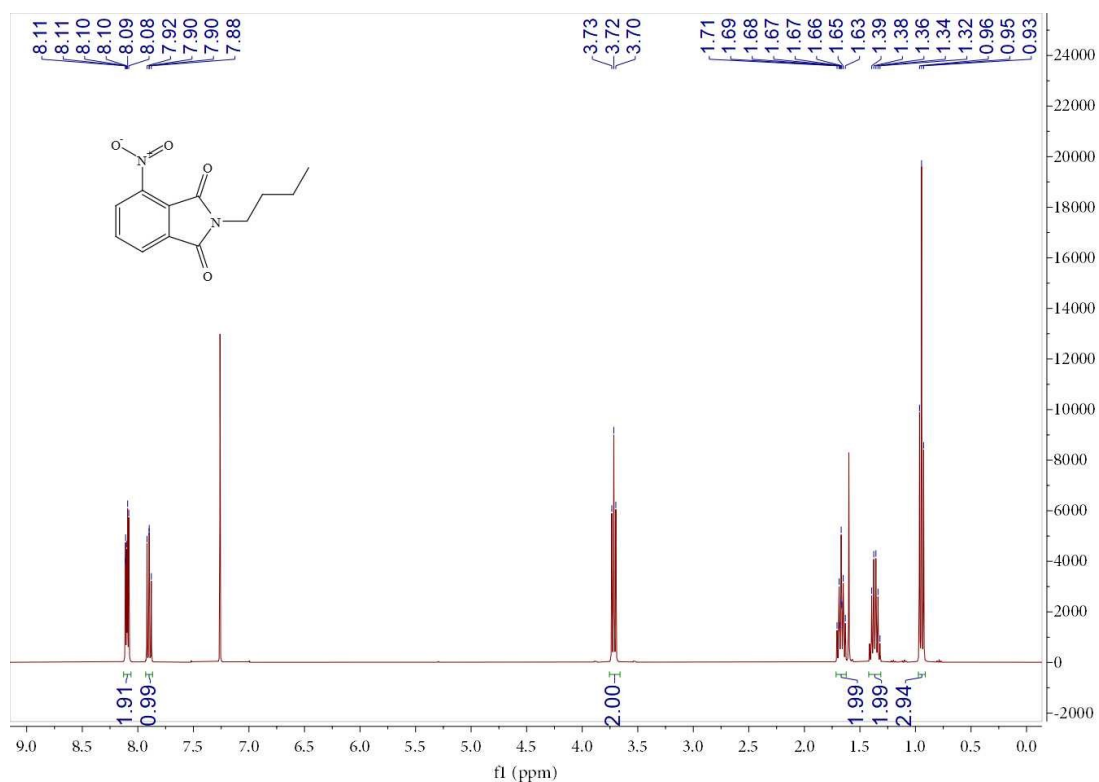

**Fig.S12**  $^1\text{H}$  NMR spectrum of compound **3a**.

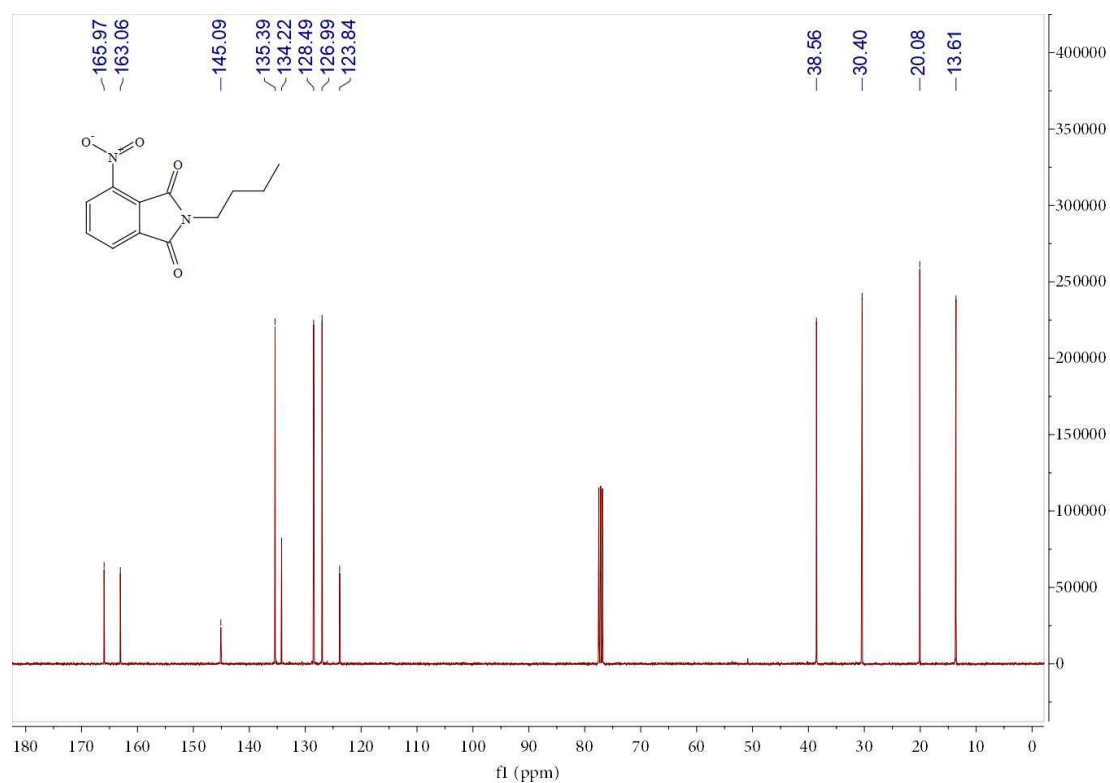

**Fig.S13**  $^{13}\text{C}$  NMR spectrum of compound **3a**.

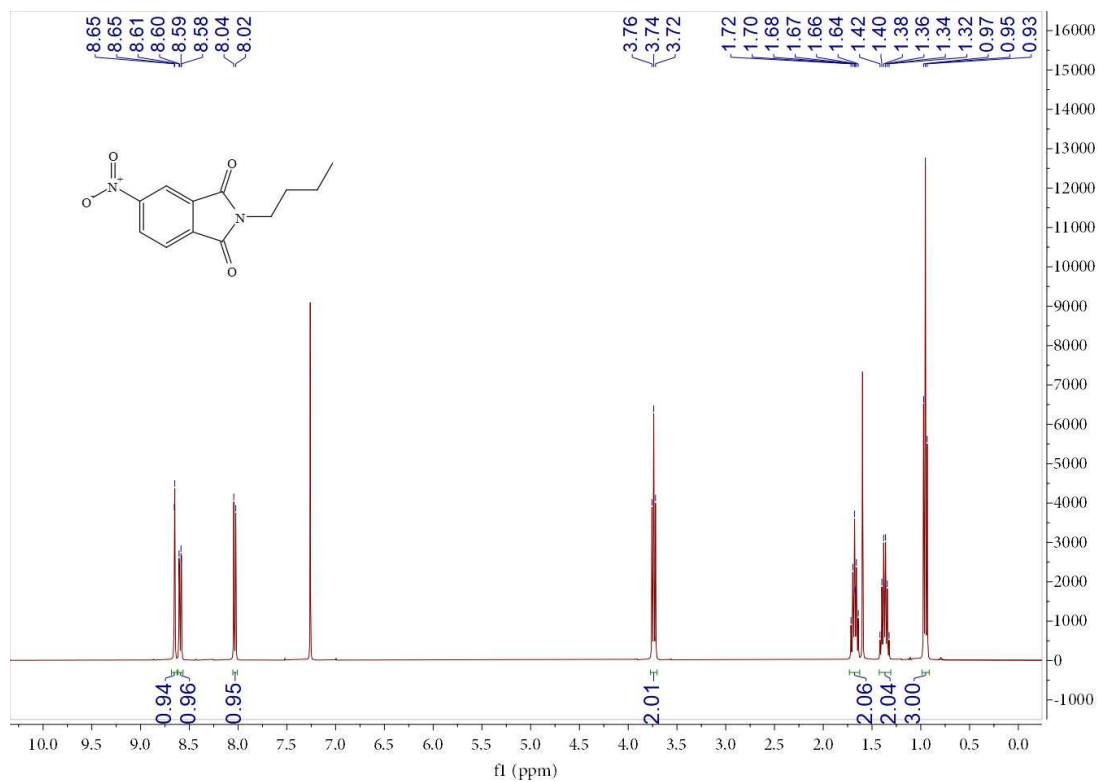

**Fig.S14**  $^1\text{H}$  NMR spectrum of compound **3b**.

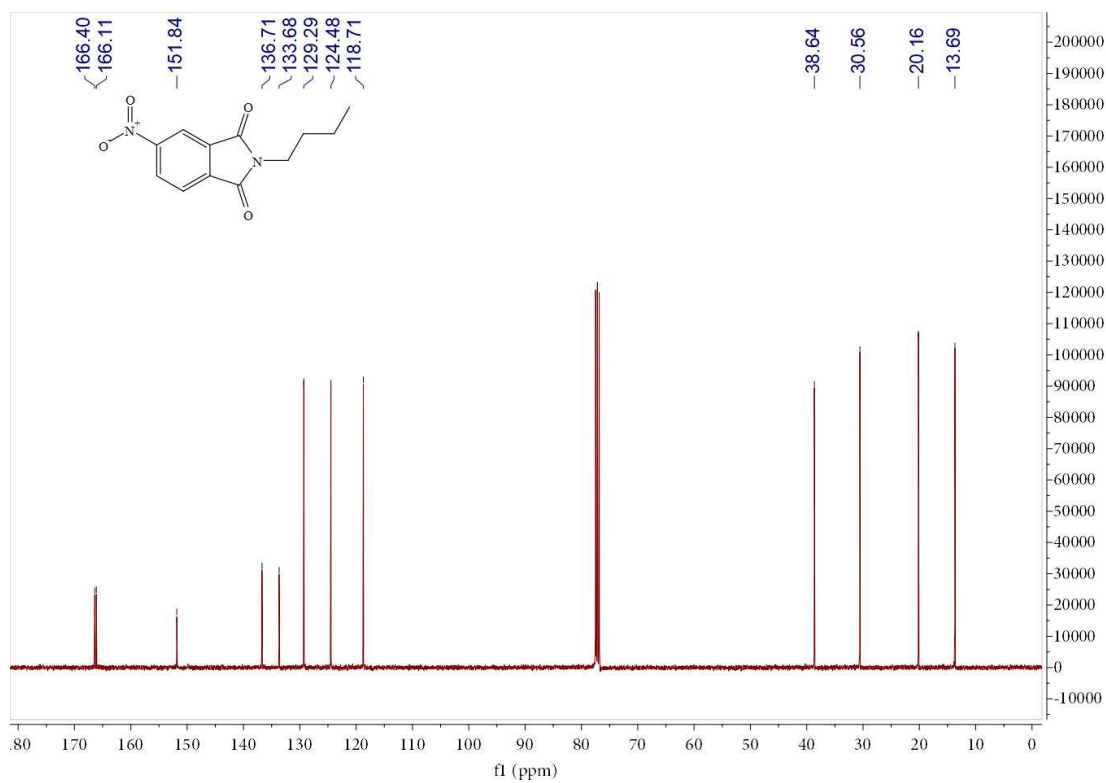

**Fig.S15**  $^{13}\text{C}$  NMR spectrum of compound **3b**.

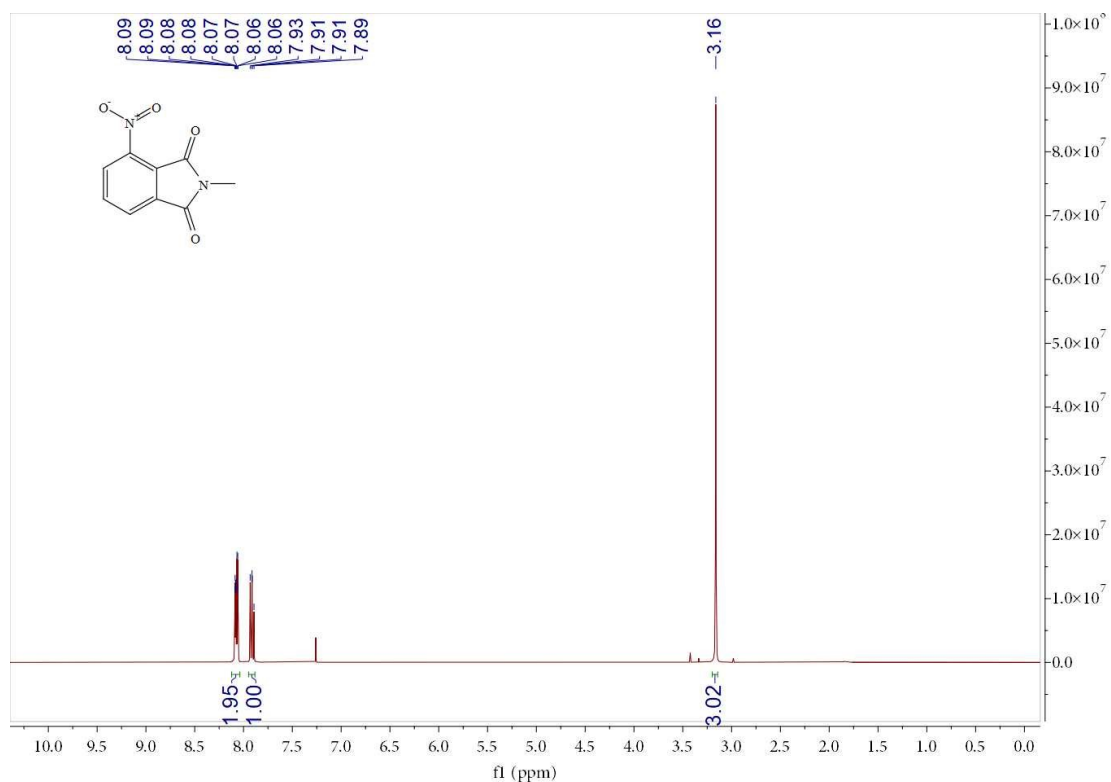

Fig.S16  $^1\text{H}$  NMR spectrum of compound 3c.

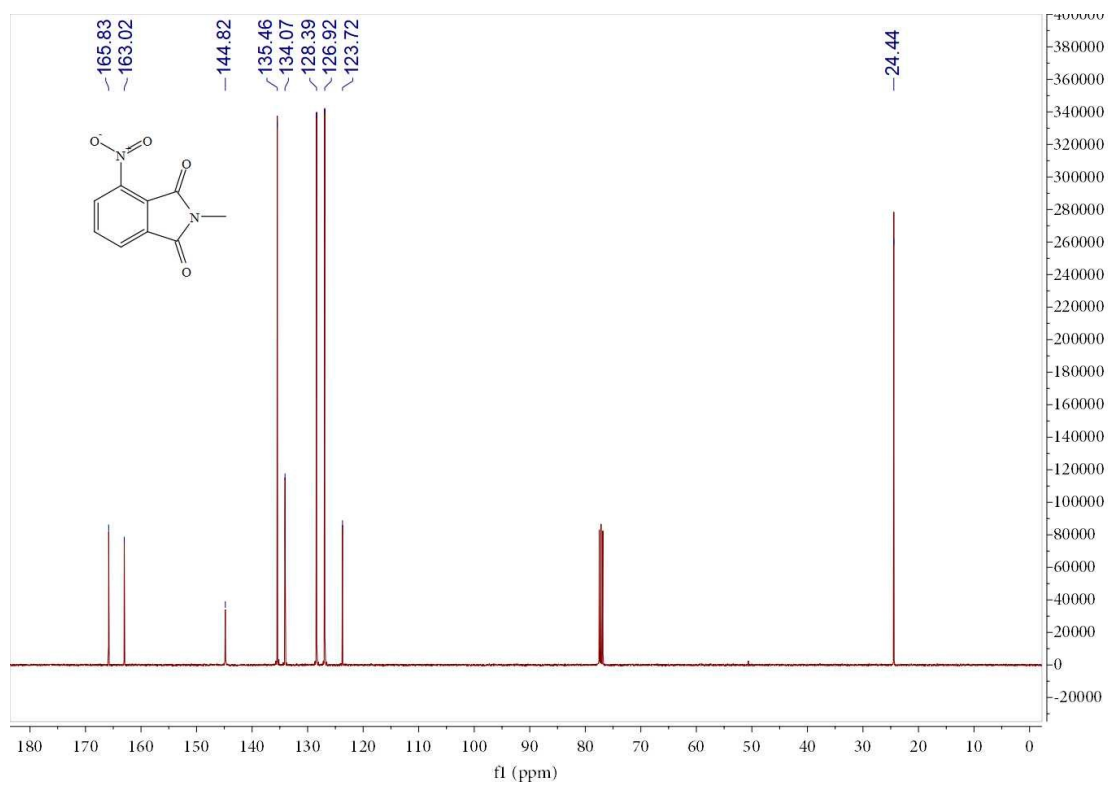

Fig.S17  $^{13}\text{C}$  NMR spectrum of compound 3c.

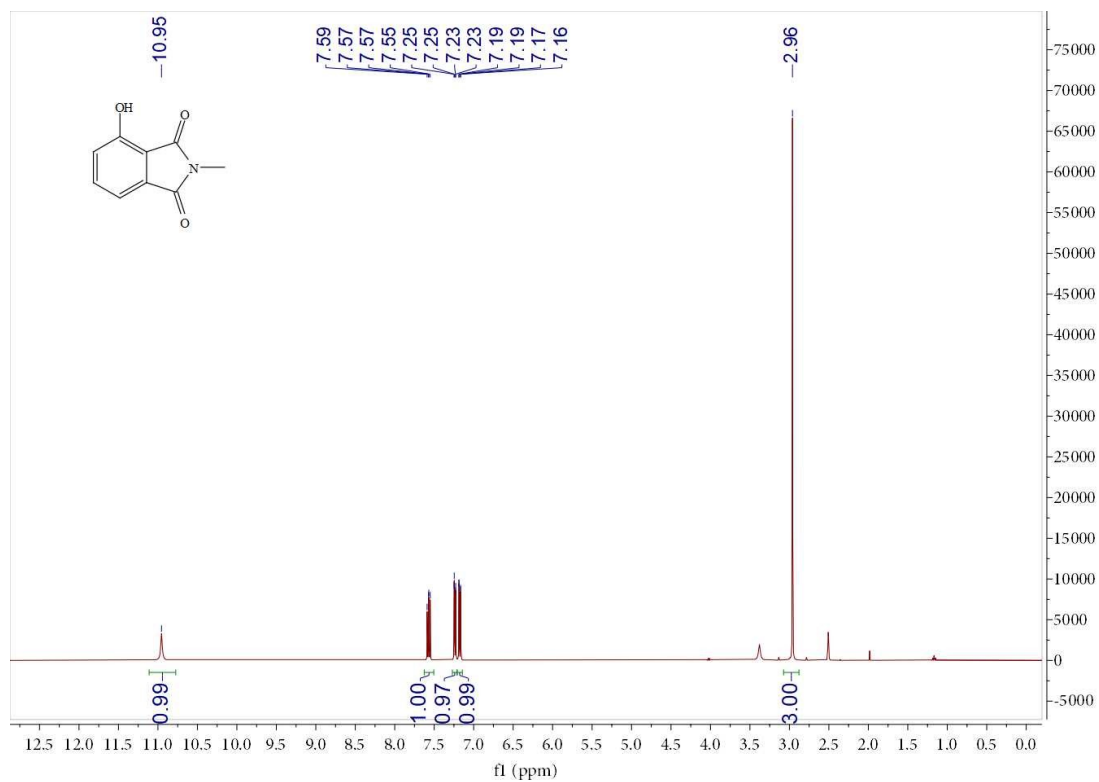

**Fig.S18**  $^1\text{H}$  NMR spectrum of compound **3d (PHI-1)**.

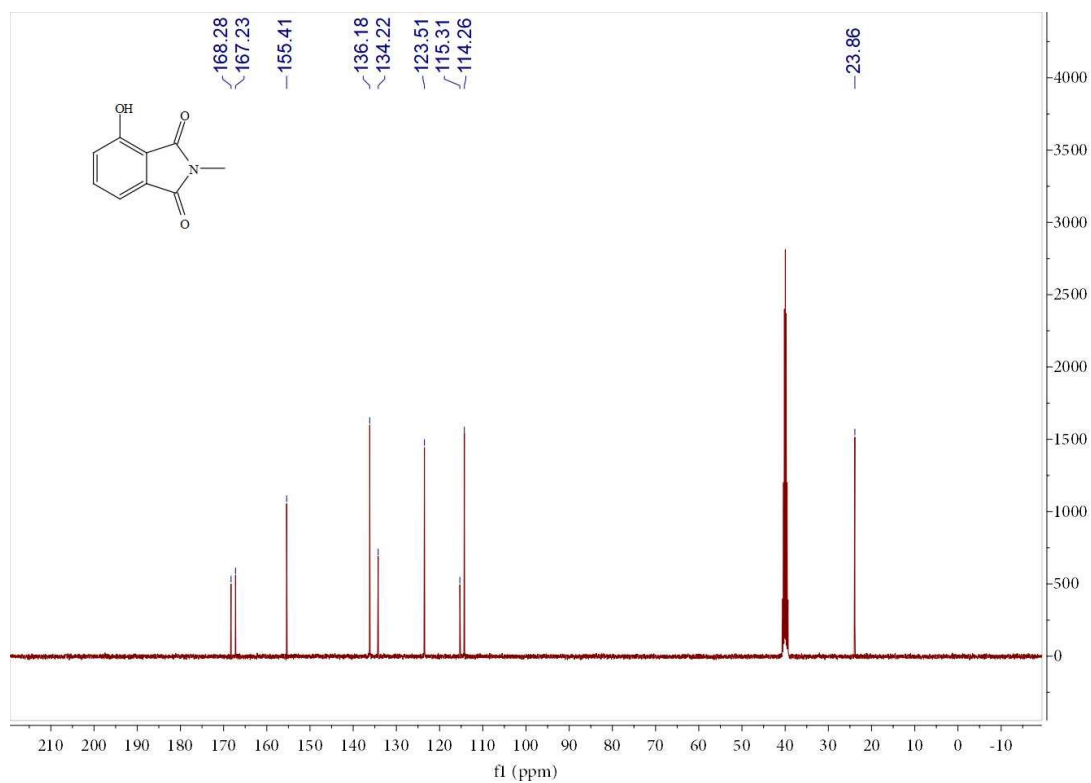

**Fig.S19**  $^{13}\text{C}$  NMR spectrum of compound **3d (PHI-1)**.

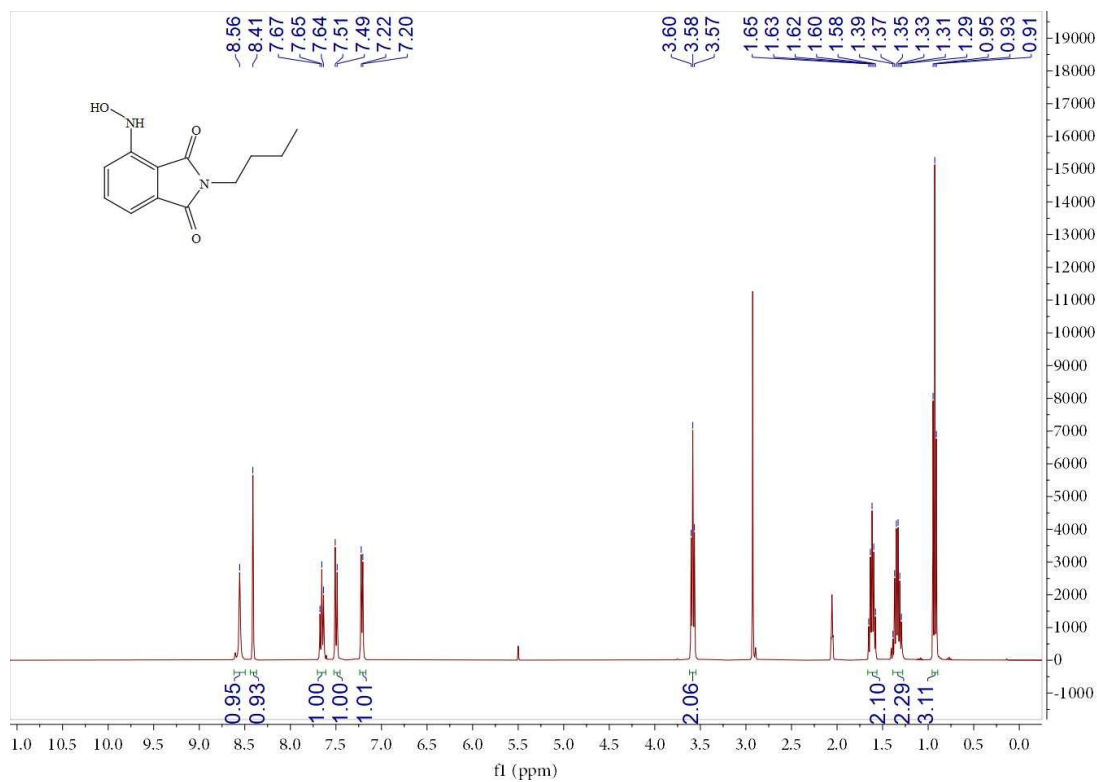

Fig.S20  $^1\text{H}$  NMR spectrum of compound 4a (P1).

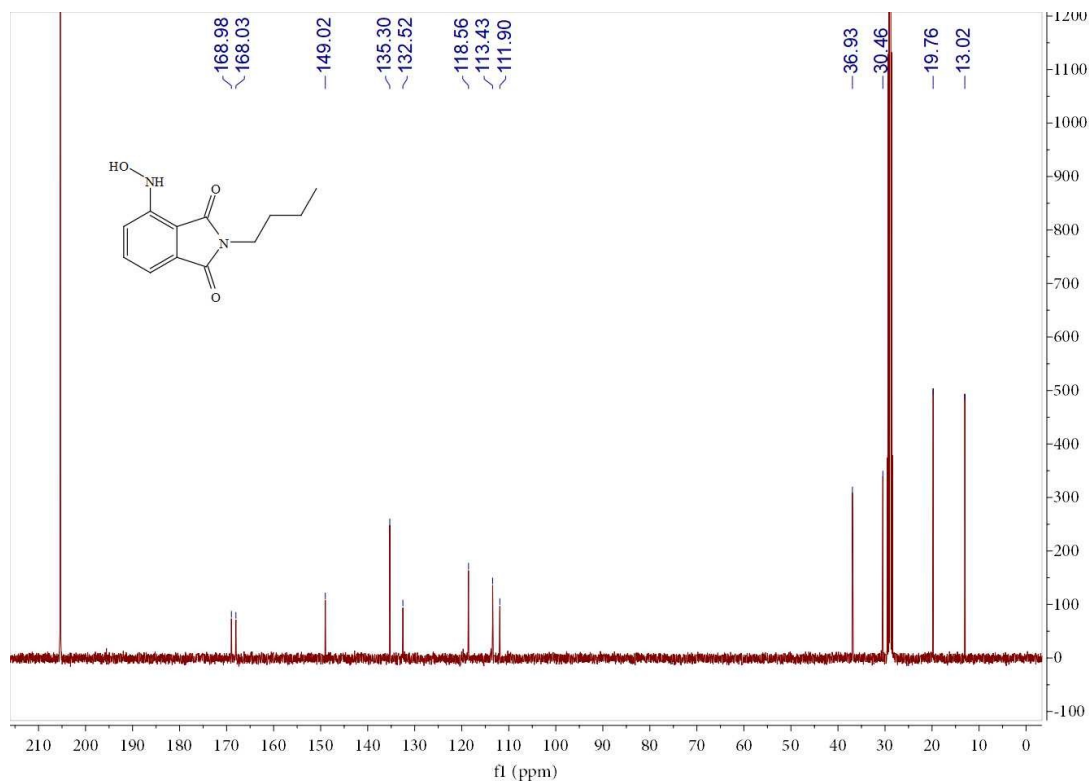

Fig.S21  $^{13}\text{C}$  NMR spectrum of compound 4a (P1).

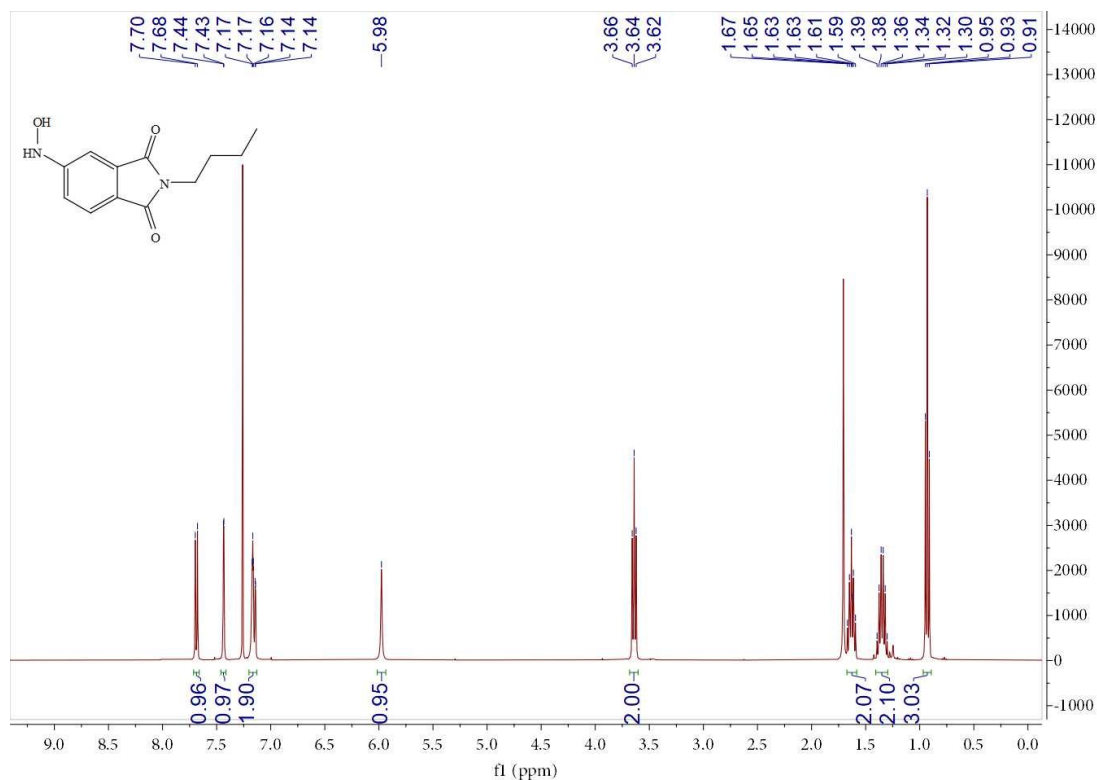

**Fig.S22**  $^1\text{H}$  NMR spectrum of compound 4b (P2).

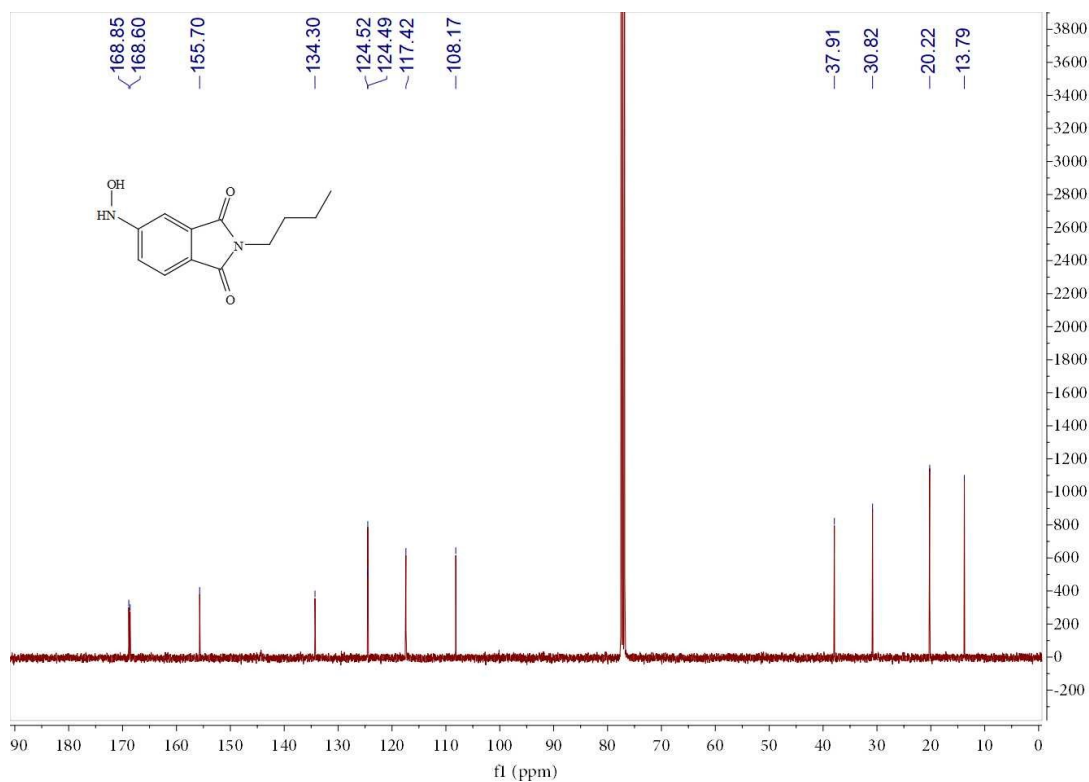

**Fig.S23**  $^{13}\text{C}$  NMR spectrum of compound 4b (P2).



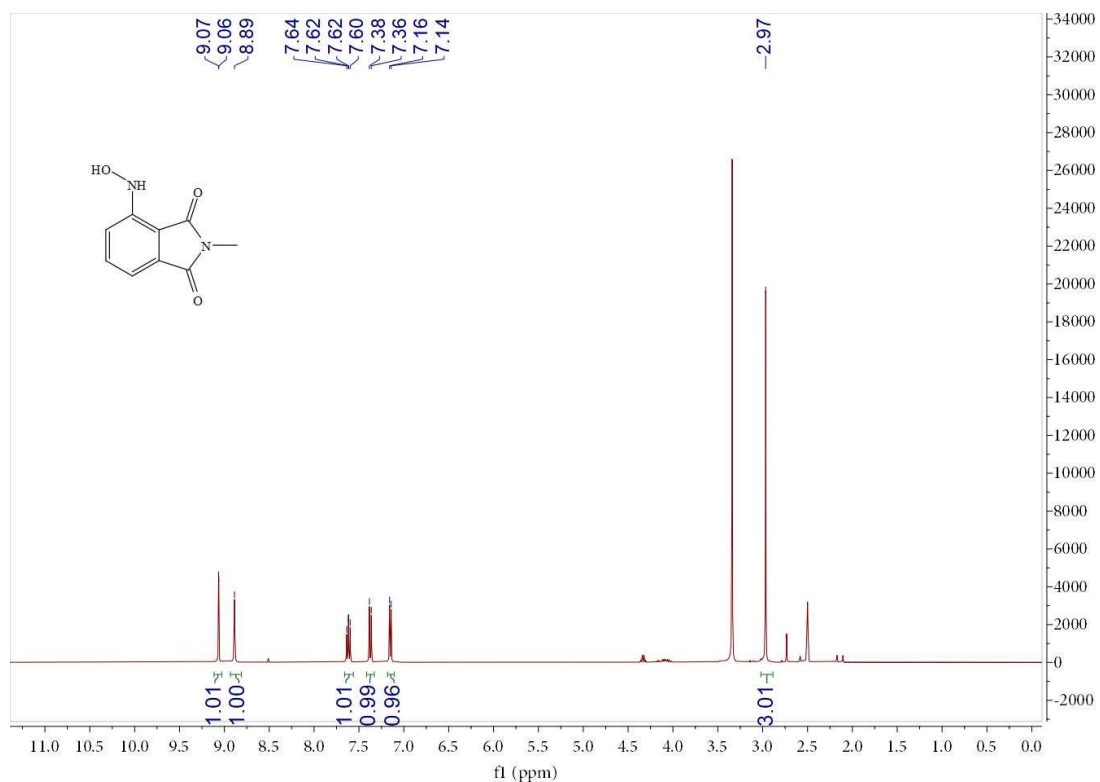

Fig.S24 <sup>1</sup>H NMR spectrum of compound 4c.

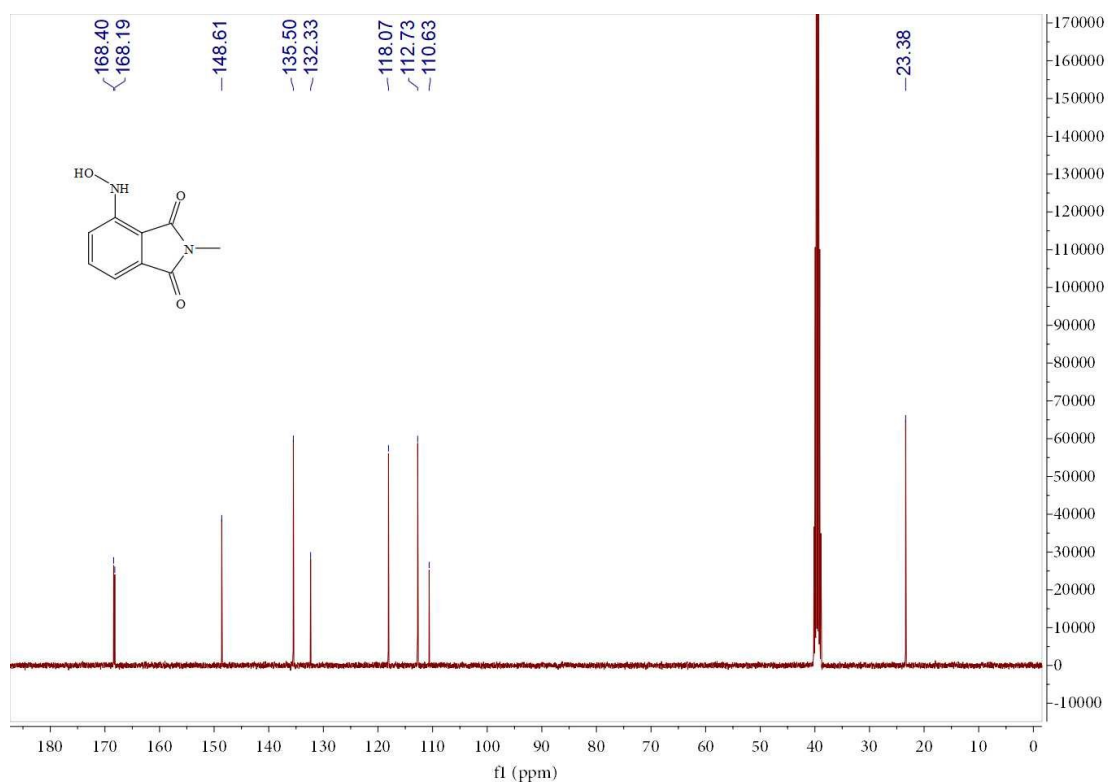

Fig.S25 <sup>13</sup>C NMR spectrum of compound 4c.

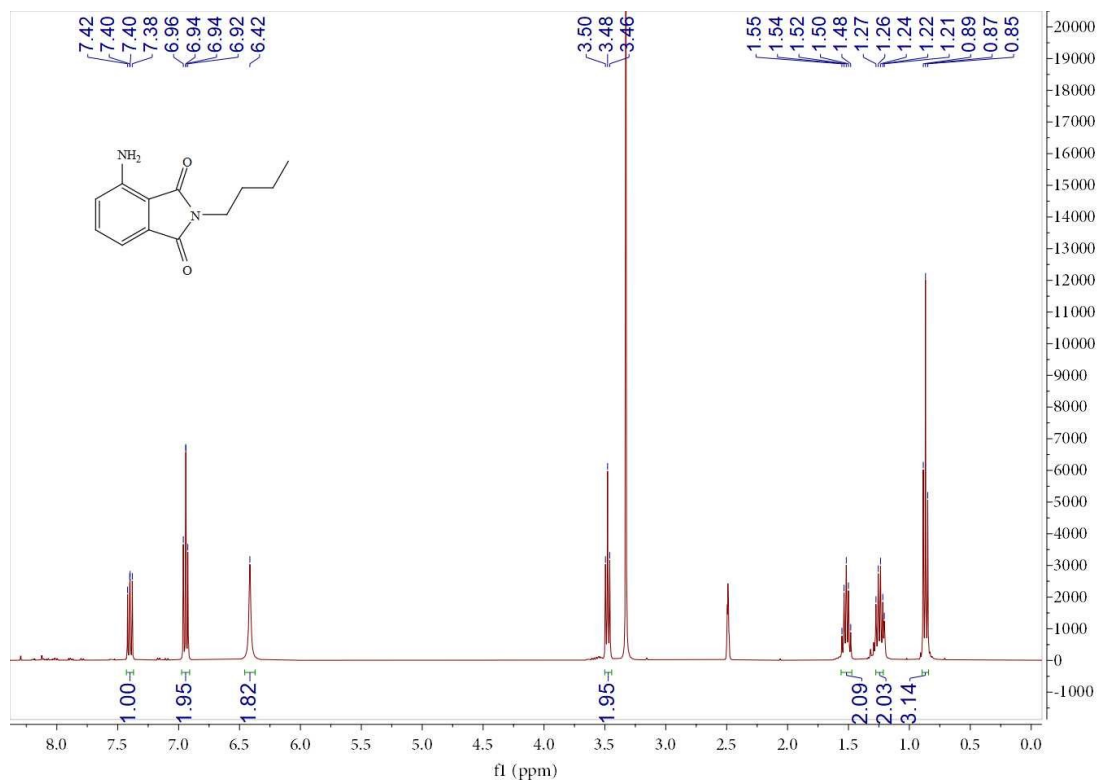

Fig.S26 <sup>1</sup>H NMR spectrum of compound 5a.

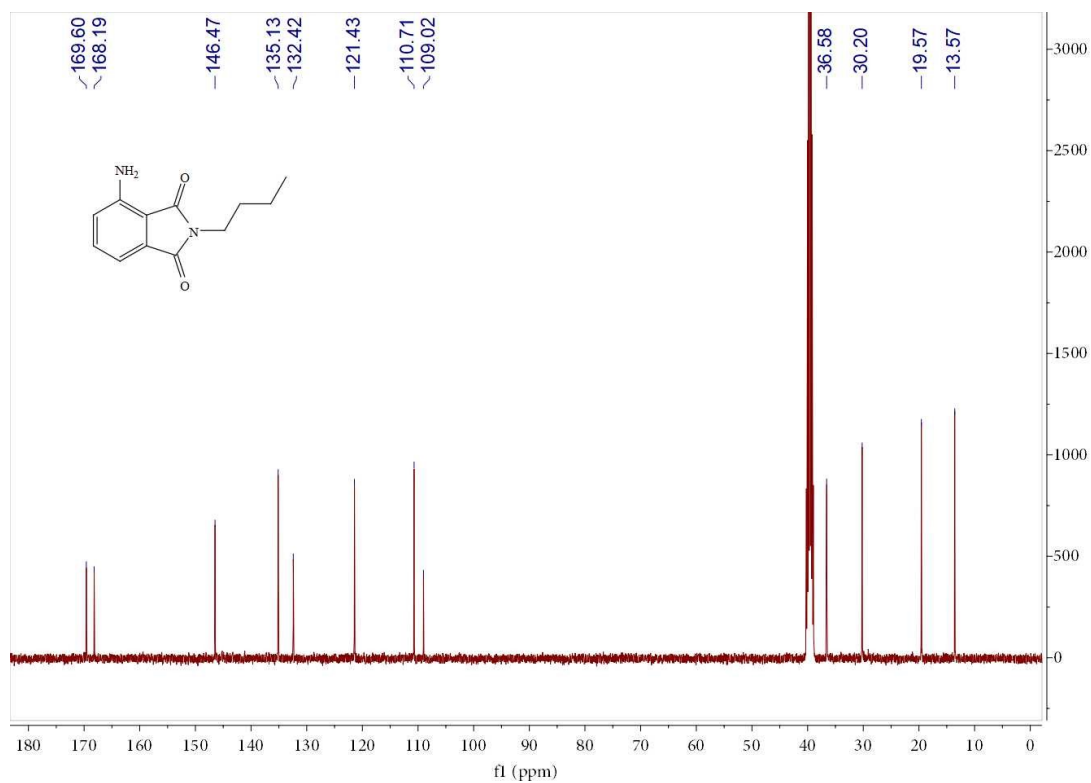

Fig.S27 <sup>13</sup>C NMR spectrum of compound 5a.

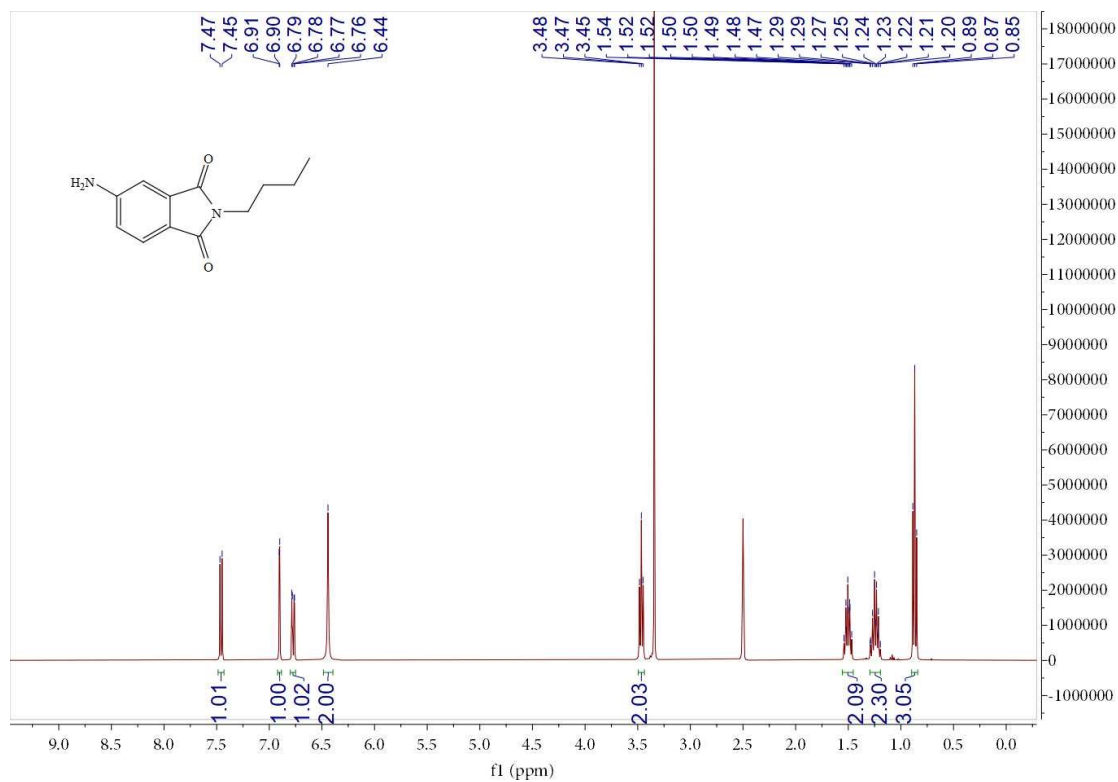

Fig.S28  $^1\text{H}$  NMR spectrum of compound 5b.

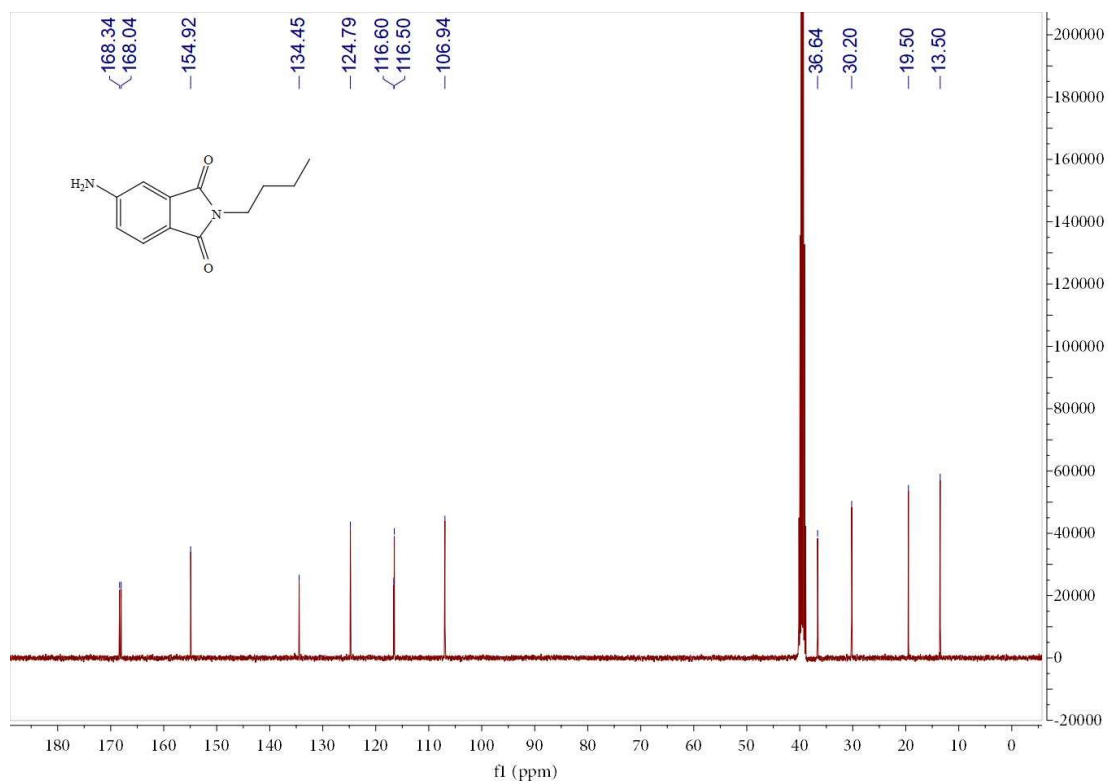

Fig.S29  $^{13}\text{C}$  NMR spectrum of compound 5b.

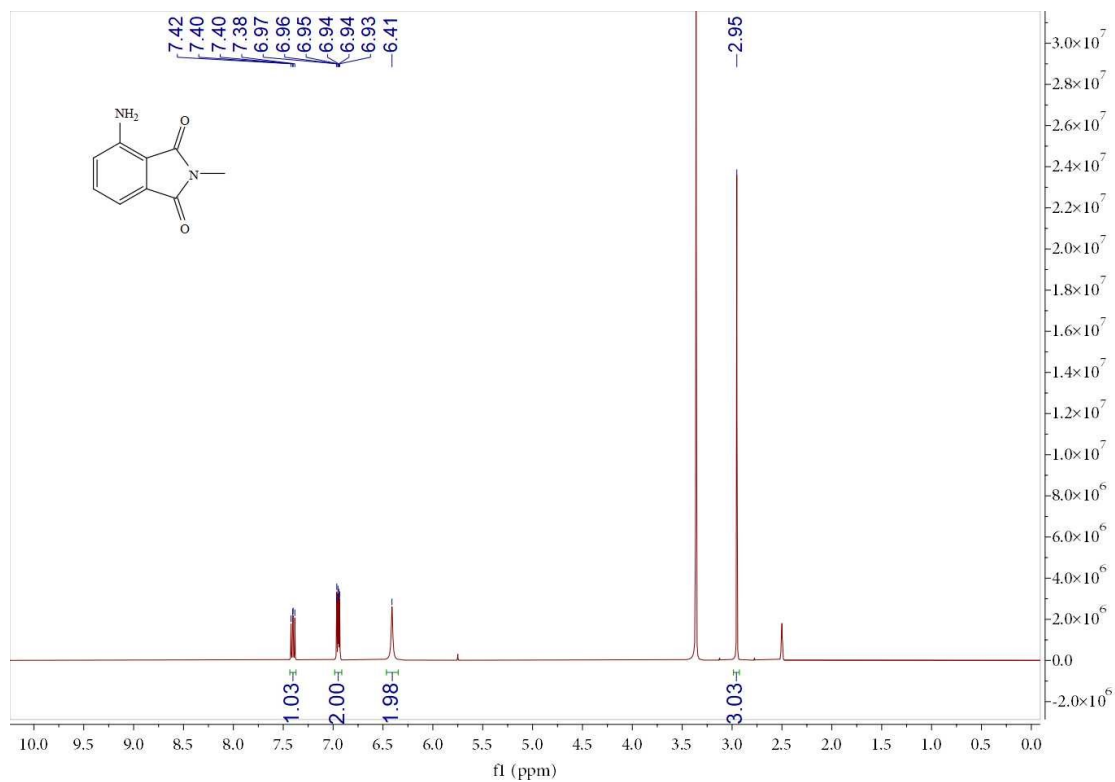

Fig.S30  $^1\text{H}$  NMR spectrum of compound 5c (PHI-2).

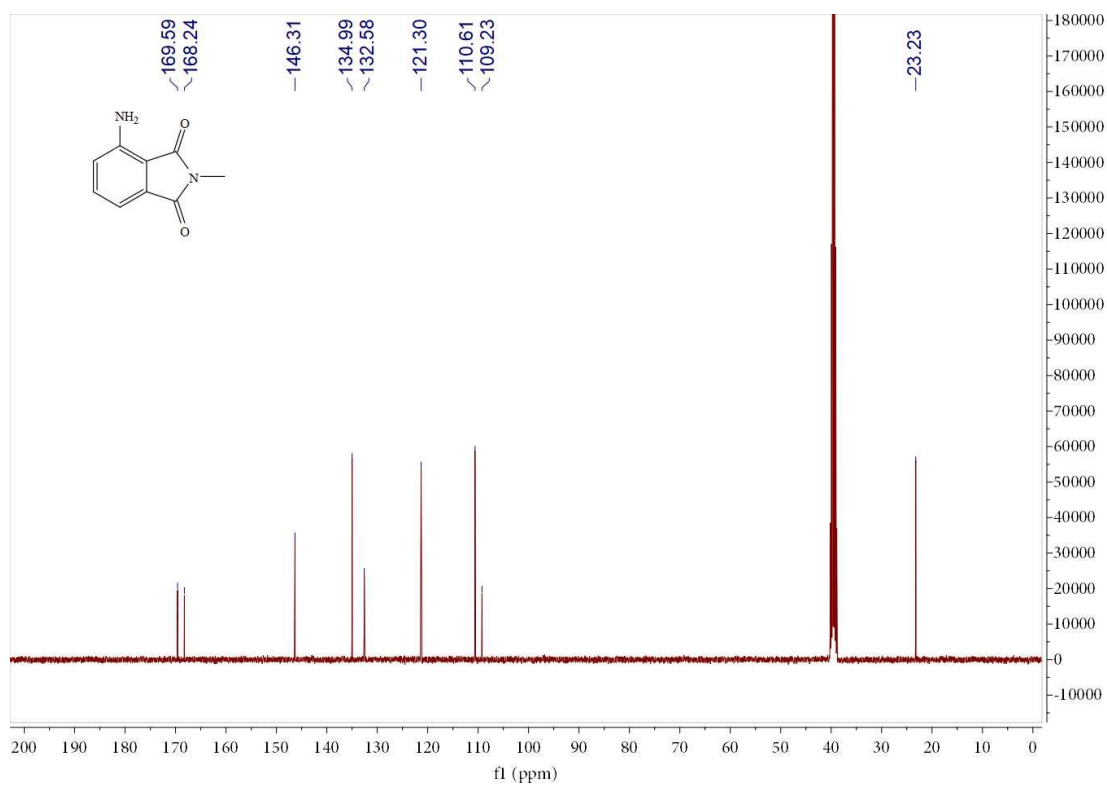

Fig.S31  $^{13}\text{C}$  NMR spectrum of compound 5c (PHI-2).

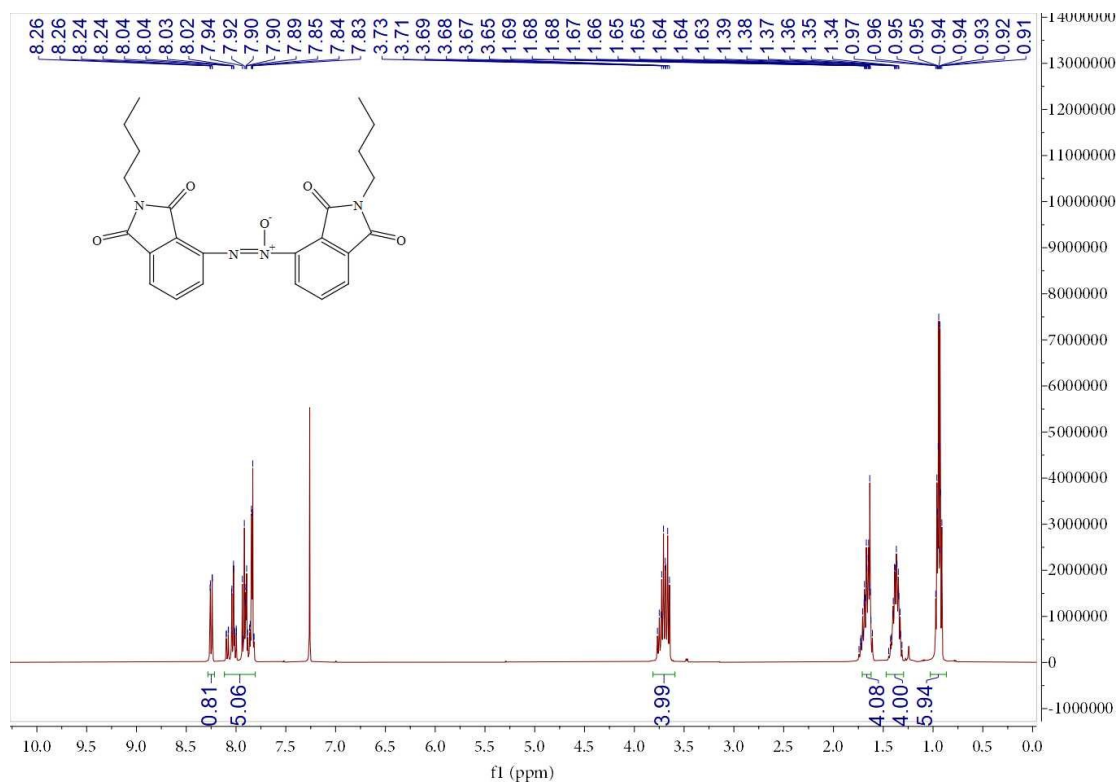

Fig.S32  $^1\text{H}$  NMR spectrum of compound 6a.

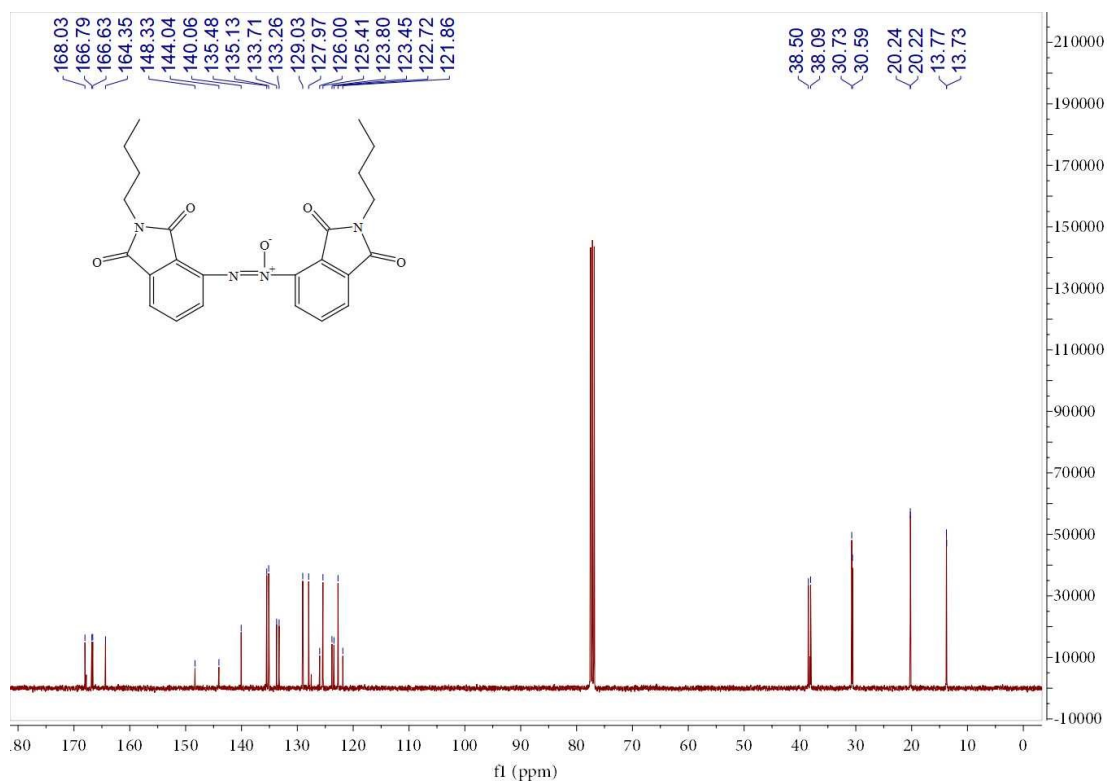

Fig.S33  $^{13}\text{C}$  NMR spectrum of compound 6a.

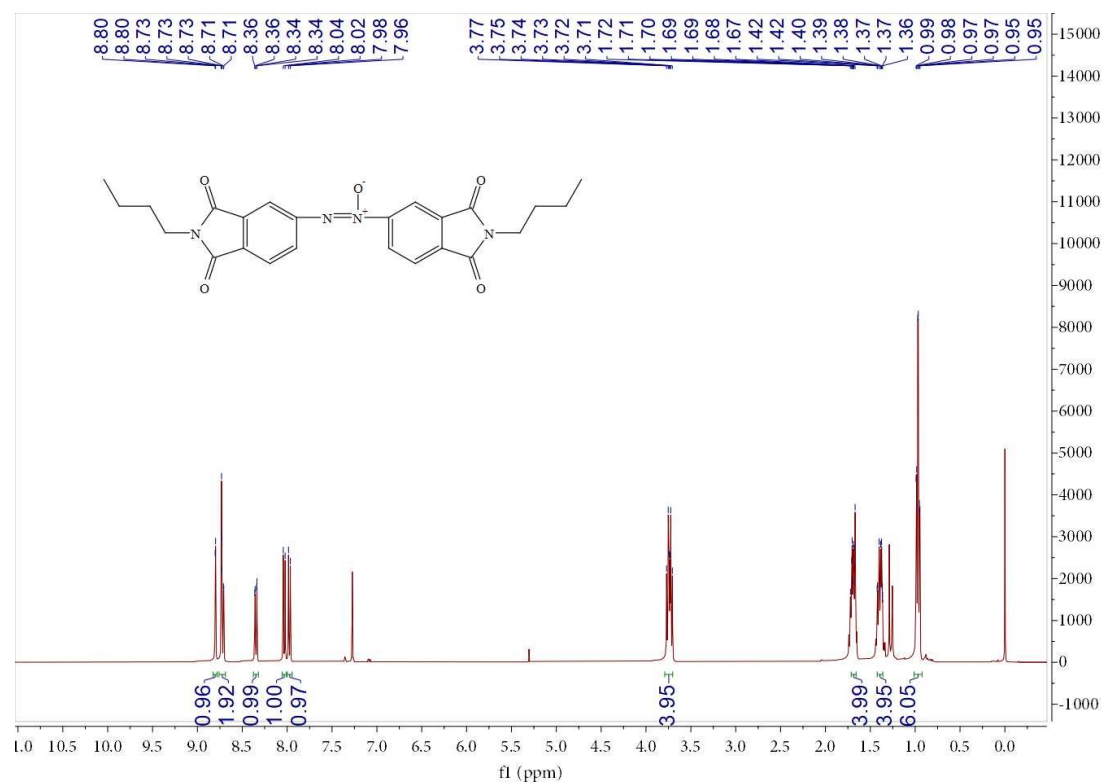

**Fig.S34** <sup>1</sup>H NMR spectrum of compound **6b**.

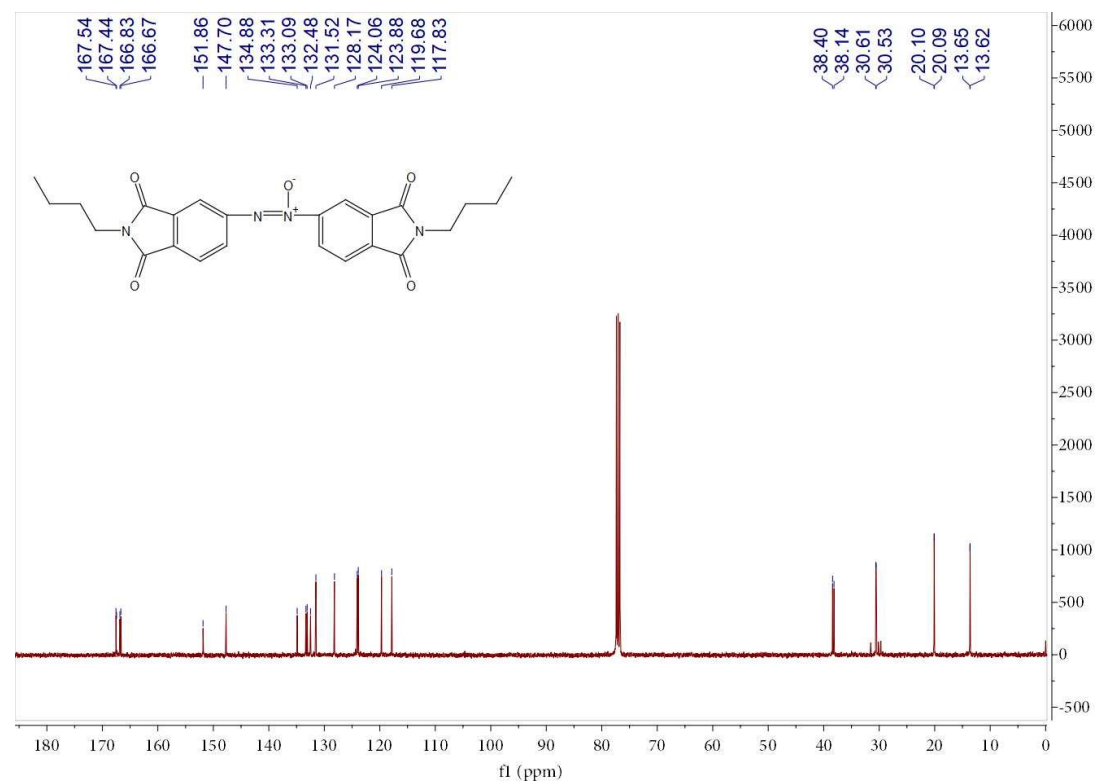

**Fig.S35** <sup>13</sup>C NMR spectrum of compound **6b**.

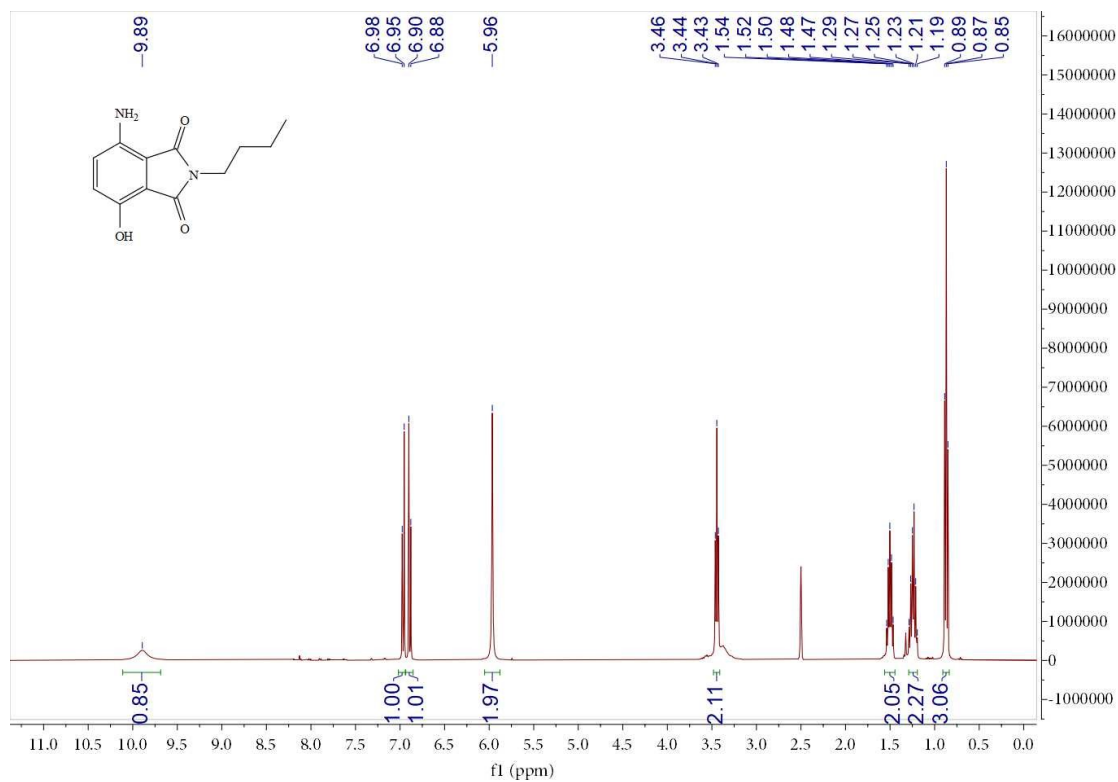

Fig.S36  $^1\text{H}$  NMR spectrum of compound 7a.

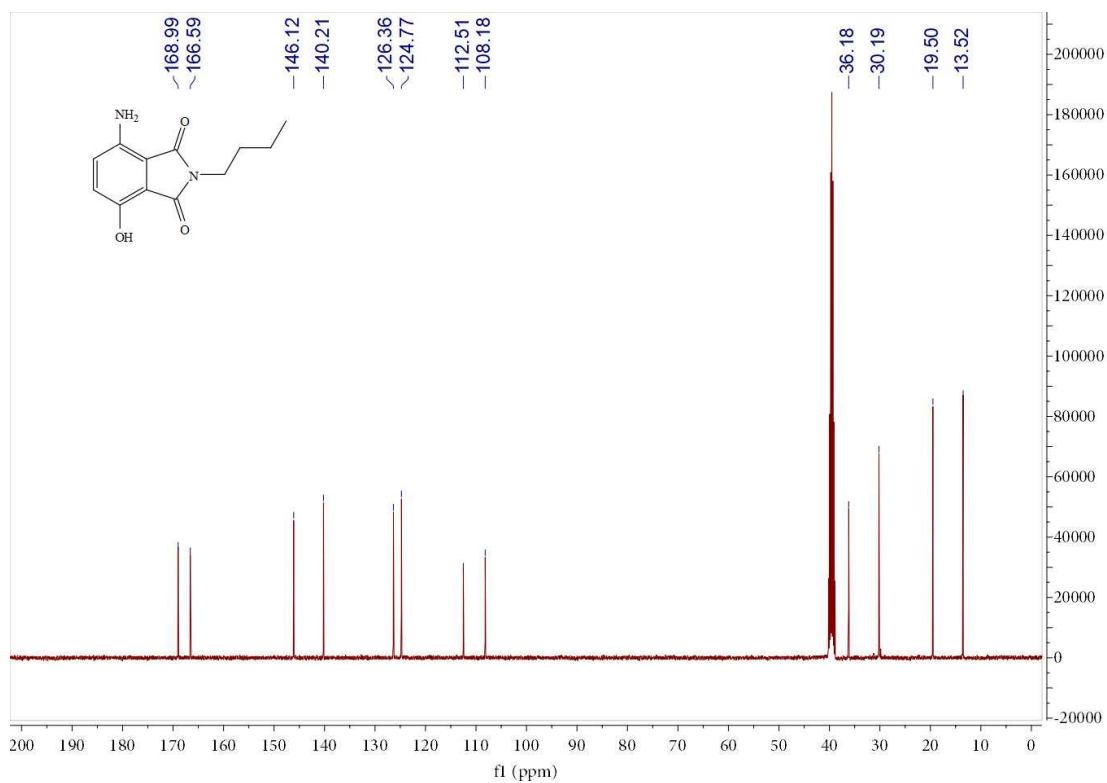

Fig.S37  $^{13}\text{C}$  NMR spectrum of compound 7a.

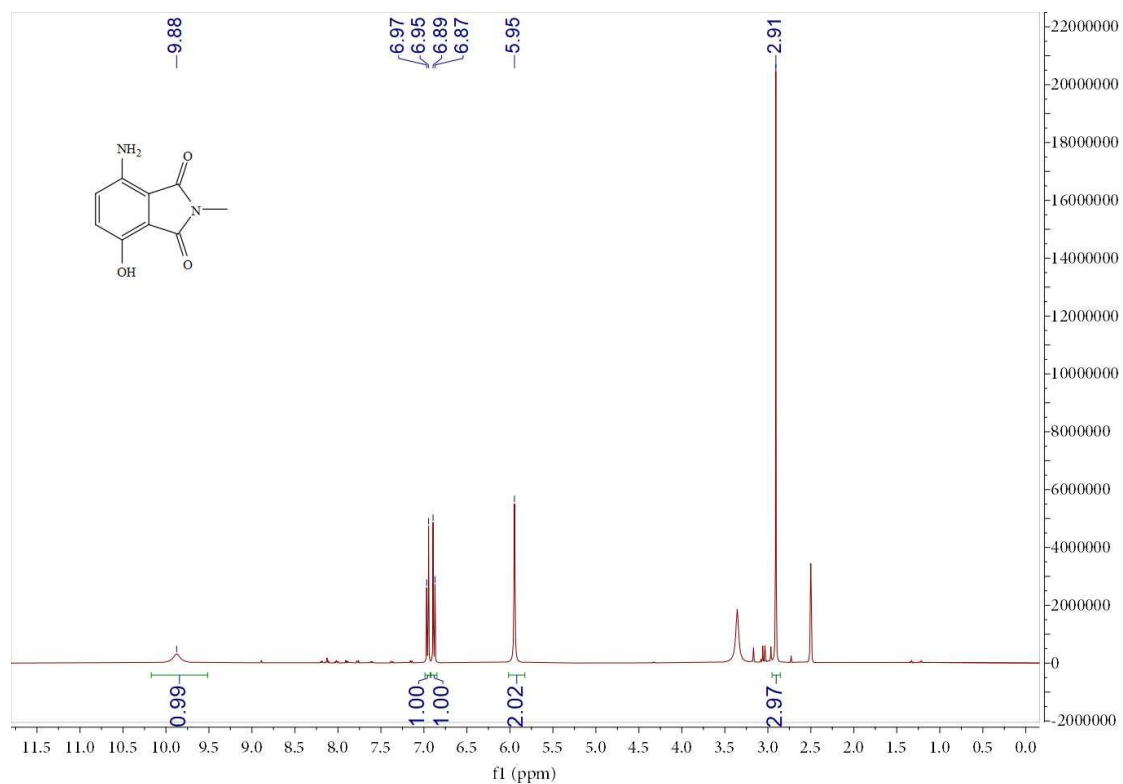

Fig.S38  $^1\text{H}$  NMR spectrum of compound 7b (PHI-3).

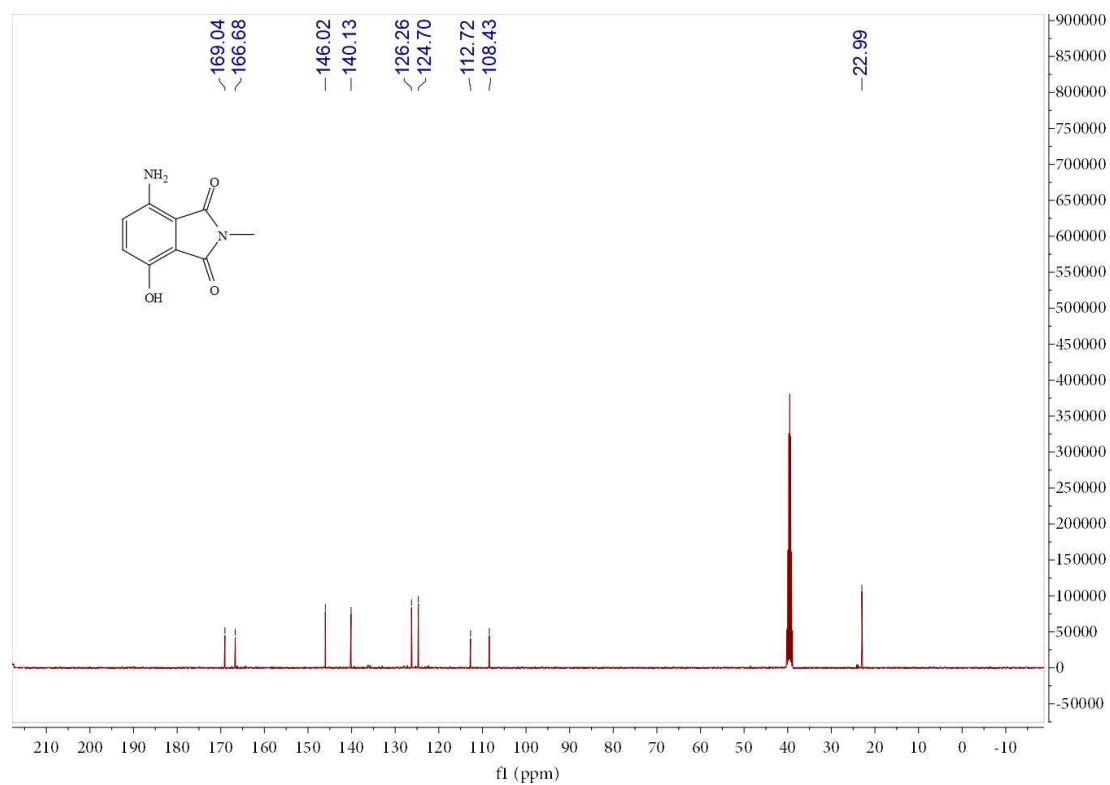

Fig.S39  $^{13}\text{C}$  NMR spectrum of compound 7b (PHI-3).



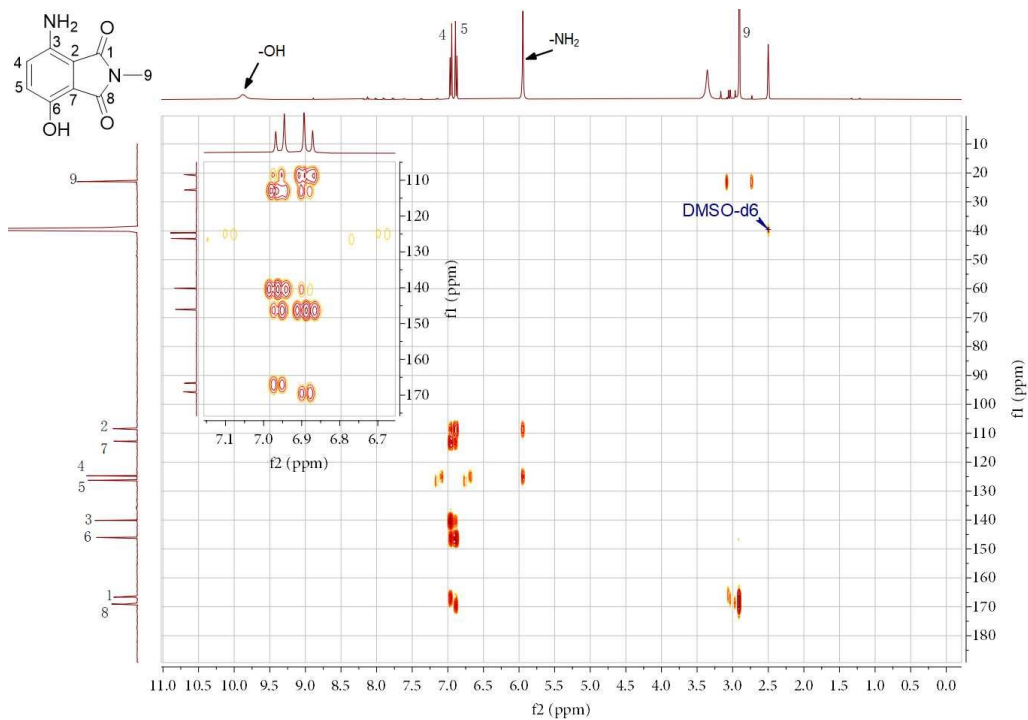

**Fig. S40.** HMBC spectrum of compound **7b (PHI-3)**.

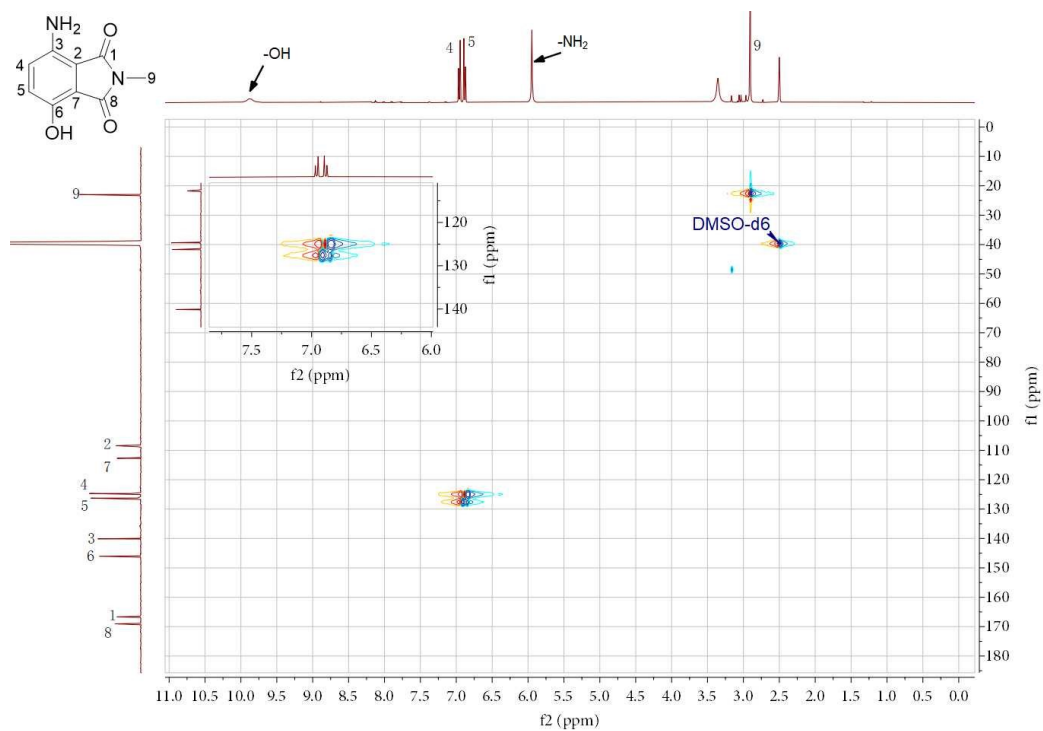

**Fig. S41.** HSQC spectrum of compound **7b (PHI-3)**.

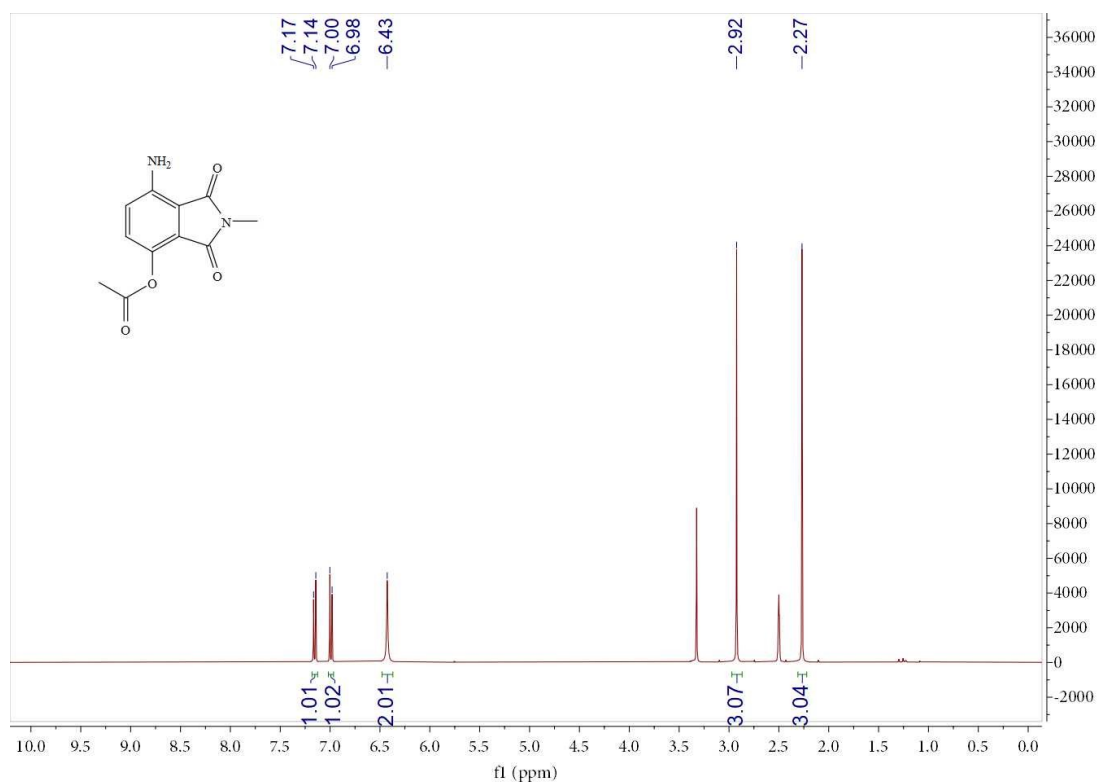

Fig.S42 <sup>1</sup>H NMR spectrum of compound 8a(PHI-4).

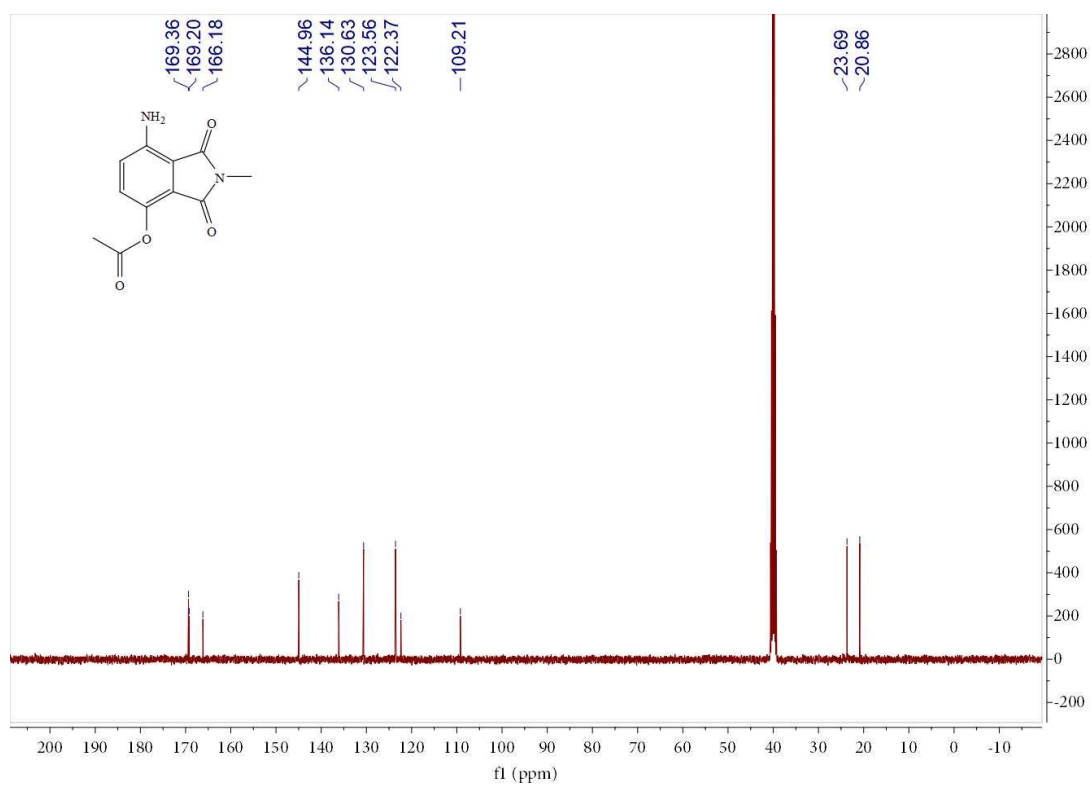

Fig.S43 <sup>13</sup>C NMR spectrum of compound 8a (PHI-4).

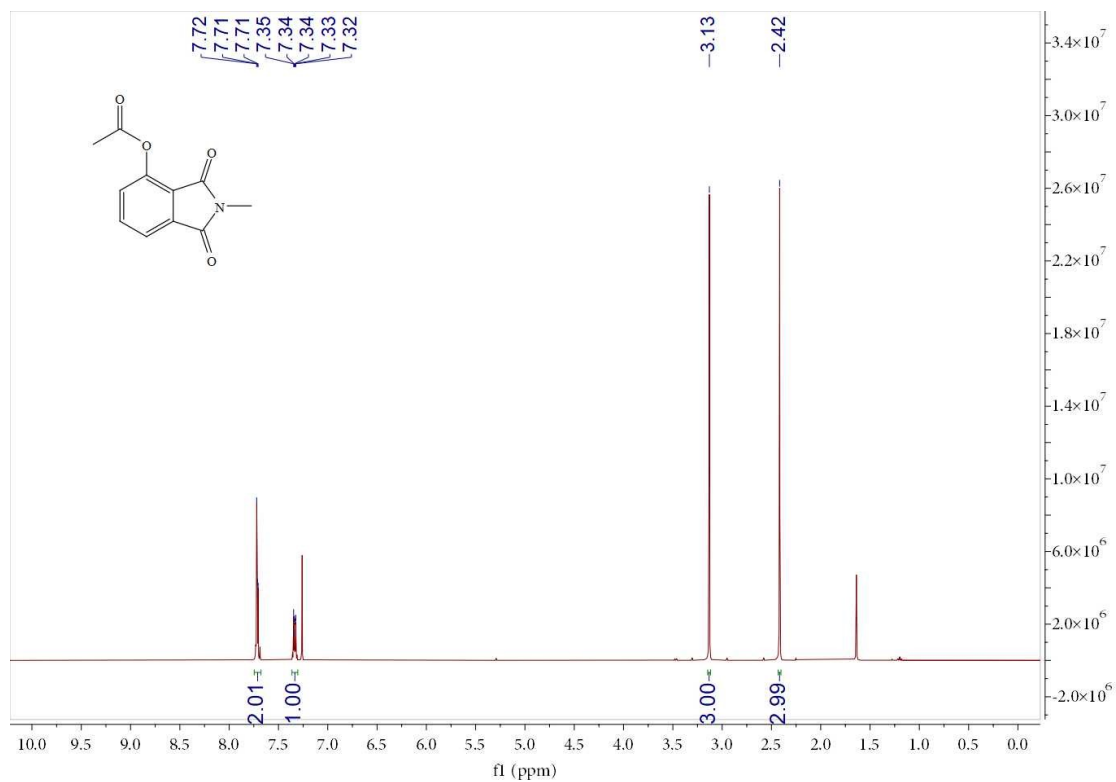

Fig.S44  $^1\text{H}$  NMR spectrum of compound **8b** (PHI-6).

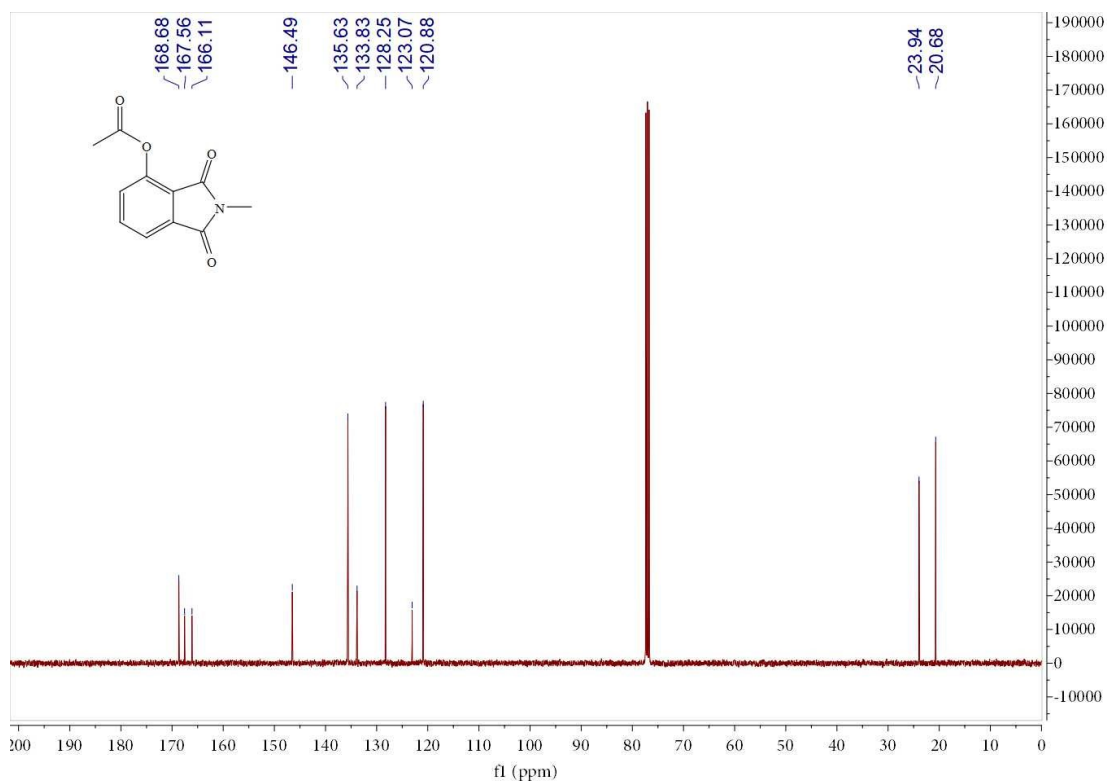

Fig.S45  $^{13}\text{C}$  NMR spectrum of compound **8b** (PHI-6).

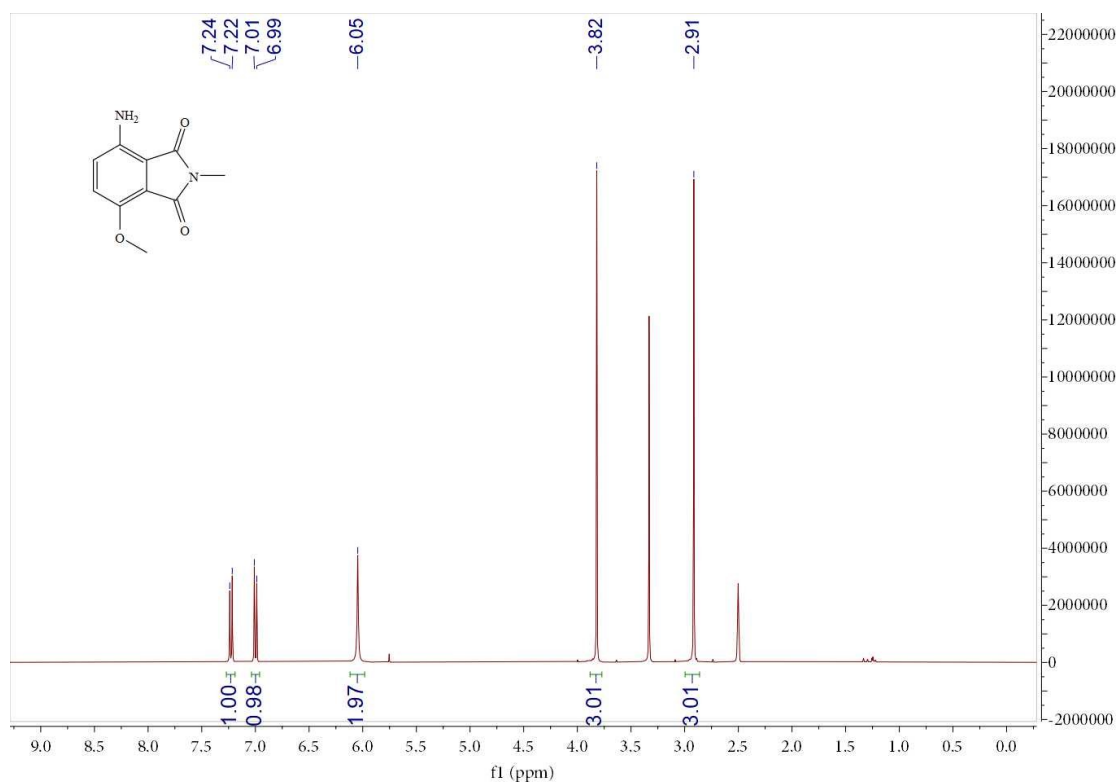

**Fig.S46**  $^1\text{H}$  NMR spectrum of compound 9 (PHI-5).

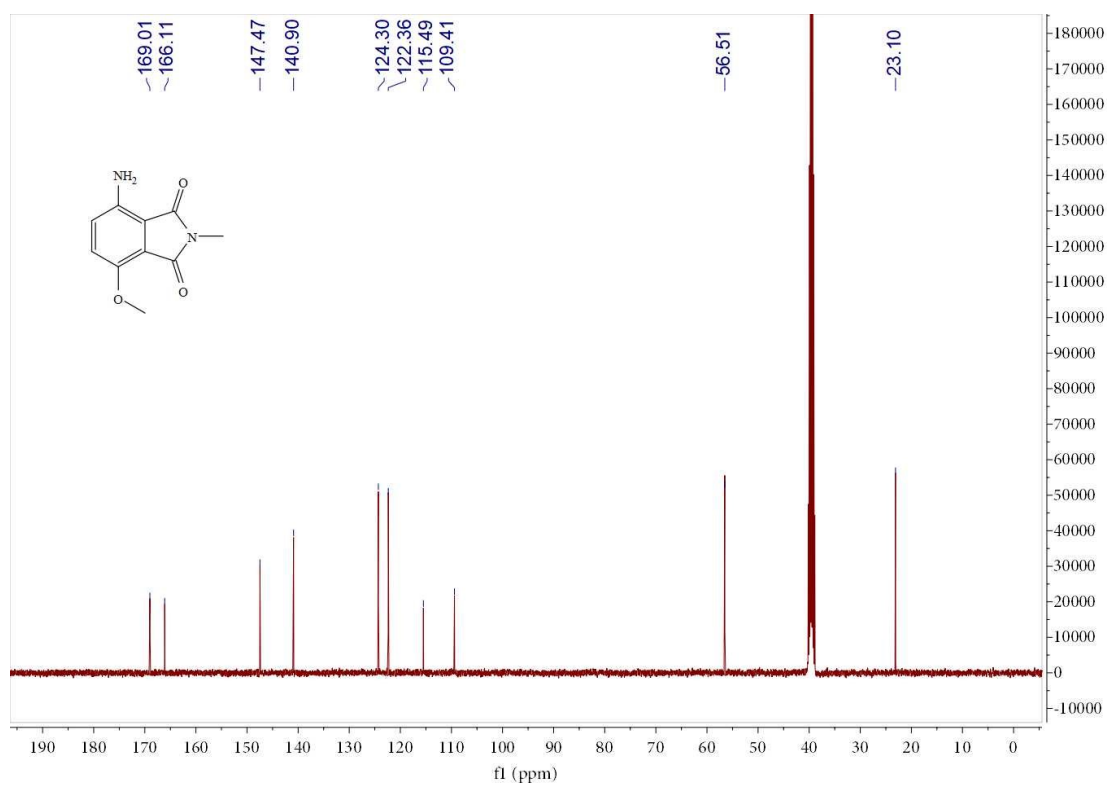

**Fig.S47**  $^{13}\text{C}$  NMR spectrum of compound 9 (PHI-5).

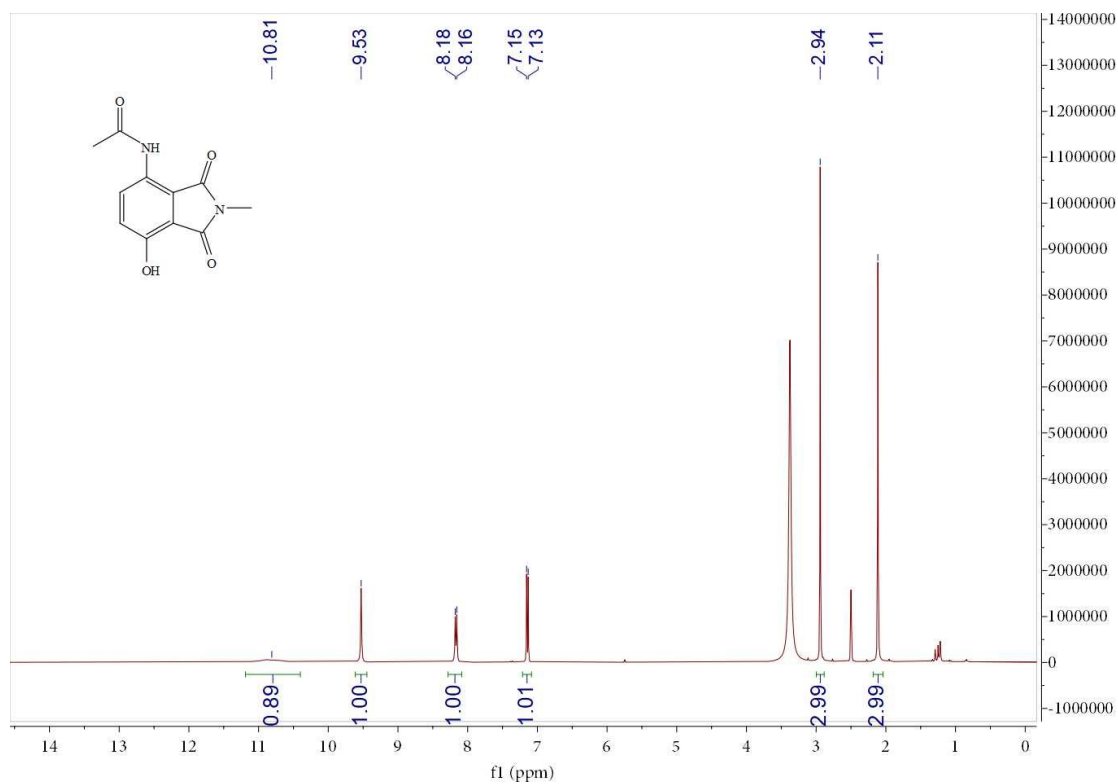

Fig.S48  $^1\text{H}$  NMR spectrum of compound 10 (PHI-7).

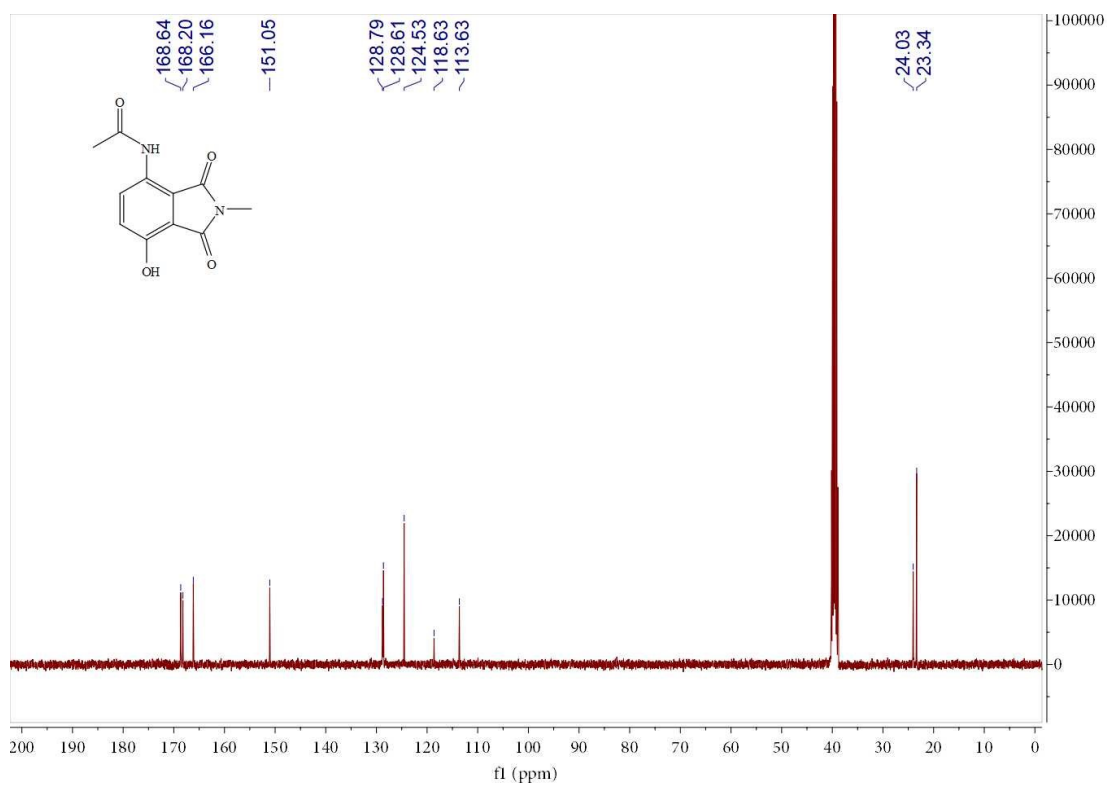

Fig.S49  $^{13}\text{C}$  NMR spectrum of compound 10 (PHI-7).

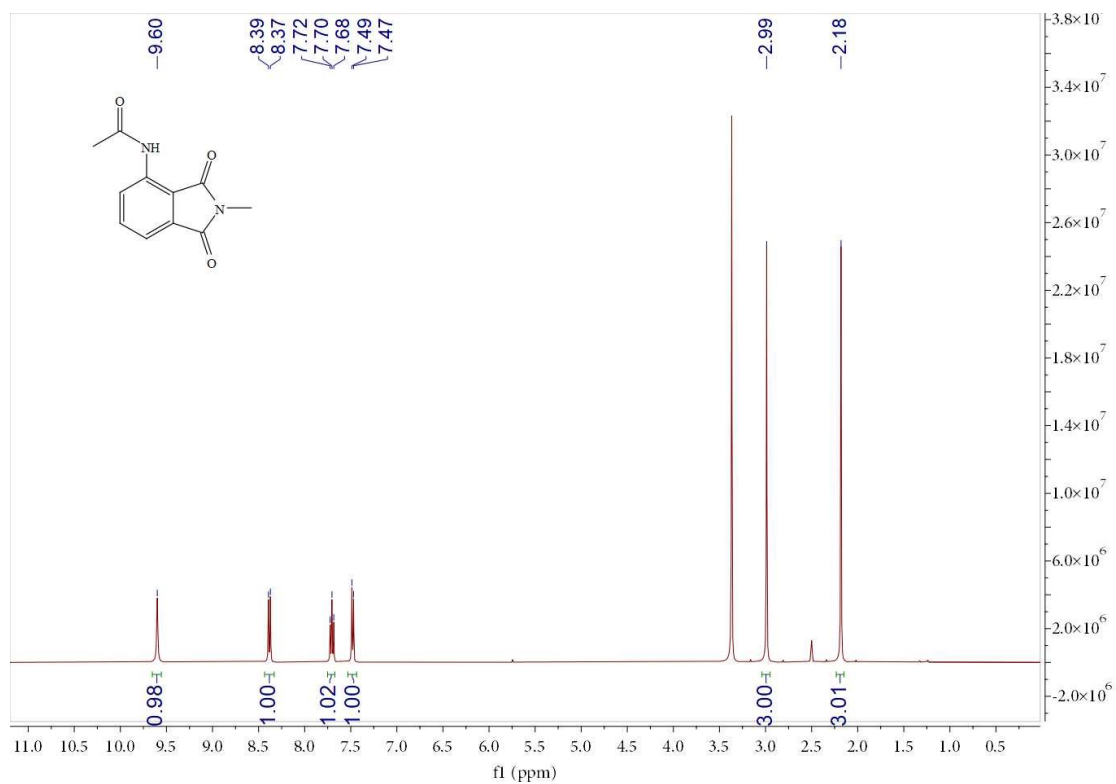

Fig.S50  $^1\text{H}$  NMR spectrum of compound 11 (PHI-8).

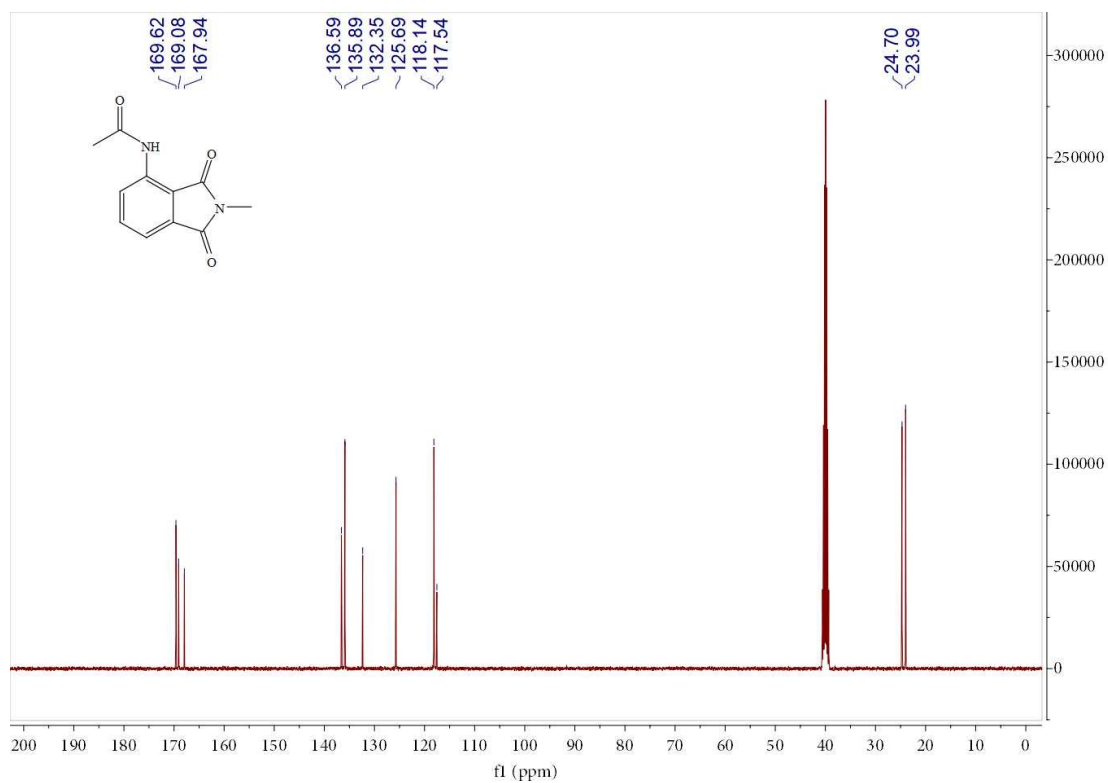

Fig.S51  $^{13}\text{C}$  NMR spectrum of compound 11 (PHI-8).

## 6. References

- [1] Konev MO, Cardinale L, Jacobi von Wangelin A. Catalyst-Free N-Deoxygenation by Photoexcitation of Hantzsch Ester. *Org Lett* 2020;22:1316-20.
- [2] Priessner M, Summers PA, Lewis BW, Sastre M, Ying L, Kuimova MK, Vilar R. Selective Detection of Cu(+) Ions in Live Cells via Fluorescence Lifetime Imaging Microscopy. *Angew Chem Int Ed Engl* 2021;60:23148-53.
- [3] Paranawithana NN, Martins AF, Clavijo Jordan V, Zhao P, Chirayil S, Meloni G, Sherry AD. A Responsive Magnetic Resonance Imaging Contrast Agent for Detection of Excess Copper(II) in the Liver In Vivo. *J Am Chem Soc* 2019;141:11009-18.
- [4] Tu HC, Chen HY, Wu CY, Lin PC. Responsive fluorescence enhancement for in vivo Cu(II) monitoring in zebrafish larvae. *Biosens Bioelectron* 2022;200:113885.
- [5] Liu J, Liu Z, Wang W, Tian Y. Real-time Tracking and Sensing of Cu(+) and Cu(2+) with a Single SERS Probe in the Live Brain: Toward Understanding Why Copper Ions Were Increased upon Ischemia. *Angew Chem Int Ed Engl* 2021;60:21351-59.
- [6] Yi XQ, He YF, Cao YS, Shen WX, Lv YY. Porphyrinic Probe for Fluorescence "Turn-On" Monitoring of Cu(+) in Aqueous Buffer and Mitochondria. *ACS Sens* 2019;4:856-64.
- [7] Zhou Z, Chen S, Huang Y, Gu B, Li J, Wu C, Yin P, Zhang Y, Li H. Simultaneous visualization and quantification of copper (II) ions in Alzheimer's disease by a near-infrared fluorescence probe. *Biosens Bioelectron* 2022;198:113858.
- [8] Zhang H, Feng L, Jiang Y, Wong YT, He Y, Zheng G, He J, Tan Y, Sun H, Ho D. A reaction-based near-infrared fluorescent sensor for Cu(2+) detection in aqueous buffer and its application in living cells and tissues imaging. *Biosens Bioelectron* 2017;94:24-29.
- [9] Tang J, Ma S, Zhang D, Liu Y, Zhao Y, Ye Y. Highly sensitive and fast responsive ratiometric fluorescent probe for Cu<sup>2+</sup> based on a naphthalimide-rhodamine dyad and its application in living cell imaging. *Sensors and Actuators B: Chemical* 2016;236:109-15.
- [10] Park SY, Kim W, Park SH, Han J, Lee J, Kang C, Lee MH. An endoplasmic reticulum-selective ratiometric fluorescent probe for imaging a copper pool. *Chem Commun (Camb)* 2017;53:4457-60.
- [11] Okamoto Y, Kishikawa N, Hagimori M, El-Maghrabey M, Kawakami S, Kuroda N. A turn-on hydrazide oxidative decomposition-based fluorescence probe for highly selective detection of Cu(2+) in tap water as well as cell imaging. *Anal Chim Acta* 2022;1217:340024.
- [12] Zhou Z, Tang H, Chen S, Huang Y, Zhu X, Li H, Zhang Y, Yao S. A turn-on red-emitting fluorescent probe for determination of copper(II) ions in food samples and living zebrafish. *Food Chem* 2021;343:128513.
- [13] Yamabe S, Zeng G, Guan W, Sakaki S. An aniline dication-like transition state in the Bamberger rearrangement. *Beilstein journal of organic chemistry* 2013;9:1073-82.
- [14] Ng SM, Wu X, Khyasudeen MF, Nowakowski PJ, Tan HS, Xing B, Yeow EKL. Vancomycin Determination by Disrupting Electron-Transfer in a Fluorescence Turn-On Squaraine-Anthraquinone Triad. *ACS Sens* 2018;3:1156-63.
